# Supplementary material for: Improved haplotype resolution of highly duplicated MHC genes in a long-read genome assembly using MiSeq amplicons
Source: PeerJ journal article supplement (doi:10.7717/peerj.15480), 2023-07-12

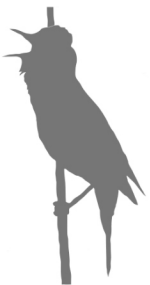

**Amplicon  
HTS**

Amplicon alleles  
amplified

Amplicon alleles  
mapped/**not mapped**

Amplicon alleles  
mapped once/  
**multiple times**

**Falcon-2017  
assembly**

Annotated alleles  
detected by unique/  
**shared** amplicon  
alleles

Annotated alleles  
detected/**not detected**

Annotated alleles  
(full length)

**MHC-I**

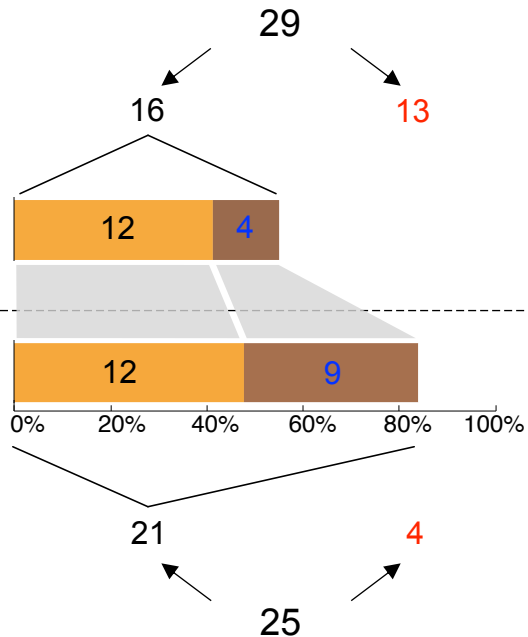

**MHC-IIb**

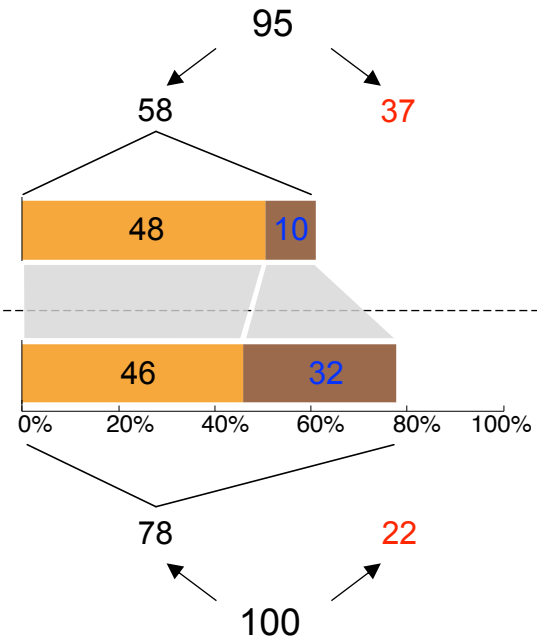

Supplement: Figure_S1.pdf [file Figure_S1.pdf]
