# Supplementary material for: Improved haplotype resolution of highly duplicated MHC genes in a long-read genome assembly using MiSeq amplicons
Source: PeerJ. 2023 Jul 12;11:e15480. doi: 10.7717/peerj.15480 (PMC10349553; doi:10.7717/peerj.15480)
Supplement: Supplemental Information 8 — List of MHC-I (exon 3) amplicon alleles in the focal individual, corresponding sequences obtained with both MHC-I primer pair combinations (HNalla/NH46; HNalla-1/R3Ex3b) and matching MHC-I allele in GeneBank (Sequence ID provided for each MHC-I amplicon allele). [file peerj-11-15480-s008.xlsx]

## Sheet: Sheet1
Name given to MHC-I amplicon allele found in the focal individual (Mellinger et al.)	MHC-I sequences obtained with primers: HNalla-1/R3Ex3b (length: 236-246 bp)	MHC-I sequences obtained with primers: HNalla/NH46 (length: 253-263 bp)	Corresponding MHC-I allele in GeneBank	Sequence ID	New sequence ID
P-10	ATGGTTGCGAGTTATCGGCTGTGAGCTCCTGTCCGACGGGAGTGTCCGTGGAACCTACCGGAATGGCTACGACGGGCGGGATTTCATCTCCTTCGACCTGGAATCCGGGAGATTCGTGCCGGCCGACAGCGCTGCTGAGATCACCAGGAGGCGCTGGGAACATGAAGGGATCGAGGCTGAGAGGAAGACGAATTACCTGAAGCACGTCTGCCCTGAATGGCTCCAGAGACACGTCAGATACGGGCA	ATGGTTGCGAGTTATCGGCTGTGAGCTCCTGTCCGACGGGAGTGTCCGTGGAACCTACCGGAATGGCTACGACGGGCGGGATTTCATCTCCTTCGACCTGGAATCCGGGAGATTCGTGCCGGCCGACAGCGCTGCTGAGATCACCAGGAGGCGCTGGGAACATGAAGGGATCGAGGCTGAGAGGAAGACGAATTACCTGAAGCACGTCTGCCCTGAATGGCTCCAGAGACACGTCAGATACGGGCAGAAGGAGCTGGAGCGCA	Acar-UA*12	MH468849.1
U-8	AGTGTTGAAAGTTTATGGCTGTGACCTCCTGTCCGACGGGAGCATCCGTGGAACCTACCGGTTTGGCTACGACGCGCGGGATTTCATCTCCTTCGAGCTGGGATCCGGGAGATTTGTGGCGGCCGACAGCGCTGCTGAGATCATCAGGAGGCGCTGGGAACATGAAGGGACCGTGGCTGAGAGACAGACGAATTACCTGAAGCACGAGTGCCCGGAATGGCTCCAGAGACATGTCAGATACGGGCA	AGTGTTGAAAGTTTATGGCTGTGACCTCCTGTCCGACGGGAGCATCCGTGGAACCTACCGGTTTGGCTACGACGCGCGGGATTTCATCTCCTTCGAGCTGGGATCCGGGAGATTTGTGGCGGCCGACAGCGCTGCTGAGATCATCAGGAGGCGCTGGGAACATGAAGGGACCGTGGCTGAGAGACAGACGAATTACCTGAAGCACGAGTGCCCGGAATGGCTCCAGAGACATGTCAGATACGGGCAGAAGGAGCTGGAGCGCA	Acar-UA*4	MH469097.1
U-2	CATACAGCGGCTTTATGGCTGTGACCTCCTGTCTGACGGGAGCATCCGTGGTTCTGATCGGTTTGGCTATGACGGGTGGGATTTCATCTCCTTCGAGCTGGGATCCGGGAGATTCGTGGCGGCCGACAGCGCTGCTGAGATCACCAGGAGGCTGTGGGAGCAGGAAGGGATCATGGCTGAGCATTGGACAAATTACCTTAAGTACGAGTGCCCAGAATTGCTCCAGAAATACGTTGGATATGGGCA	CATACAGCGGCTTTATGGCTGTGACCTCCTGTCTGACGGGAGCATCCGTGGTTCTGATCGGTTTGGCTATGACGGGTGGGATTTCATCTCCTTCGAGCTGGGATCCGGGAGATTCGTGGCGGCCGACAGCGCTGCTGAGATCACCAGGAGGCTGTGGGAGCAGGAAGGGATCATGGCTGAGCATTGGACAAATTACCTTAAGTACGAGTGCCCAGAATTGCTCCAGAAATACGTTGGATATGGGCAGAAGGAGCTGGAGCGCA	Acar-UA*144	MH468874.1
U-3	ATGGTTGAAAGTTTATGGCTGTGACCTCCTGTCCGACGGGAGTGTCCATGGAACCTACCGGCACGGCTACGACGGGCGGGATTTCATCTCCCTTGACCTGGAATCCGGGAGATTCGTGCCGGCCGACAGCGGAGCTGAGATCACCAGGAGGCGCTGGGAACATGAAGGGATCGTGGCTGAGAGACAGACGAATTACCTGAAGCACGAGTGCCCGGAATGGCTCCAGAAATACGTCAGATATGGGCA	ATGGTTGAAAGTTTATGGCTGTGACCTCCTGTCCGACGGGAGTGTCCATGGAACCTACCGGCACGGCTACGACGGGCGGGATTTCATCTCCCTTGACCTGGAATCCGGGAGATTCGTGCCGGCCGACAGCGGAGCTGAGATCACCAGGAGGCGCTGGGAACATGAAGGGATCGTGGCTGAGAGACAGACGAATTACCTGAAGCACGAGTGCCCGGAATGGCTCCAGAAATACGTCAGATATGGGCAGAAGGAGCTGGAGCGCA	Acar-UA*9	MH469150.1
U-6	ACGGTTGCGAGTTTACGGCTGTGAGCTCCTGTCCGACGGGAGCGTCCGTGGATCCTACCGGAATGGCTACGACGGGCGGGATTTCATCTTCTTCAAGCTGGGATCCAGGAGATTTGTGGCGGCCGACAGCGCTGCTGAGATCACCAGGAGGCGCTGGGAACATGAAGGGACCCCGGCTGAGCATTGGACGAATTACCTGAAGCATGAGTGCCCGGAATGGCTCCGGAAATACGTCGGATACGGGCG	NA	Acar-UA*465		OP524109
U-9	ATGGTTGCGAGTTATCGGCTGTGACCTCCTGTCCGACGGGAGTGTCCGTGGAACCTACCGGAATGGCTACGACGGGCGGGATTTCATCTCCTTCGAGCTGGGATCCGGGAGATTCGTGCCGGCCGACAGCGCTGCTGAGATCACCAGGAGGCGCTGGGAACATGAAGGGATCGAGGCTGAGAGGAAGACGAATTACCTGAAGCACGAGTGCCCGGAATGGCTCCAGAGACACGTCAGATACGGGCA	ATGGTTGCGAGTTATCGGCTGTGACCTCCTGTCCGACGGGAGTGTCCGTGGAACCTACCGGAATGGCTACGACGGGCGGGATTTCATCTCCTTCGAGCTGGGATCCGGGAGATTCGTGCCGGCCGACAGCGCTGCTGAGATCACCAGGAGGCGCTGGGAACATGAAGGGATCGAGGCTGAGAGGAAGACGAATTACCTGAAGCACGAGTGCCCGGAATGGCTCCAGAGACACGTCAGATACGGGCAGAAGGAGCTGGAGCGCA	Acar-UA*48	MH469109.1
M-27	ATGGTTGCGAGTTATCGGCTGTGAGCTCCTGTCCGACGGGAGCGTCCGTGGATCTTACCGGAATGGCTATGACGGGCGGGATTTCATCTCCTTCGACCTGGAATCCGGGAGATTCGTGCCGGCCGACAGCGCTGCTGAGATCACCAGGAGGCGCTGGGAACATGAAGGGATCGAGGCTGAGAGGAAGACGAATTACCTGAAGCACGTCTGCCCTGAATGGCTCCAGAGACACGTCAGATATGGGCA	ATGGTTGCGAGTTATCGGCTGTGAGCTCCTGTCCGACGGGAGCGTCCGTGGATCTTACCGGAATGGCTATGACGGGCGGGATTTCATCTCCTTCGACCTGGAATCCGGGAGATTCGTGCCGGCCGACAGCGCTGCTGAGATCACCAGGAGGCGCTGGGAACATGAAGGGATCGAGGCTGAGAGGAAGACGAATTACCTGAAGCACGTCTGCCCTGAATGGCTCCAGAGACACGTCAGATATGGGCAGAAGGAGCTGGAGCGCA	Acar-UA*330	MH469033.1
P-11	ATGGTTGACAGTTTACGGCTGTGAGCTCCTGTCCGACGGGAGCGTCCGTGGATCCTTCCGGTACGGCTACGACGGGCGGGATTTCATCTCCTTCGAGCTGGGATCCGGGAGATTCGTGCCGGCCGACAGCGCTGCTGAGATCACCAGGAGGCGCTGGGAACATGAAGGGACTGTGGCTGAGCGTTGGACGAATTACCTGAAGCACAAGTGCCCGGAATGGCTCCAGAAATACGTCGGATACGGGCA	ATGGTTGACAGTTTACGGCTGTGAGCTCCTGTCCGACGGGAGCGTCCGTGGATCCTTCCGGTACGGCTACGACGGGCGGGATTTCATCTCCTTCGAGCTGGGATCCGGGAGATTCGTGCCGGCCGACAGCGCTGCTGAGATCACCAGGAGGCGCTGGGAACATGAAGGGACTGTGGCTGAGCGTTGGACGAATTACCTGAAGCACAAGTGCCCGGAATGGCTCCAGAAATACGTCGGATACGGGCAGAAGGAGCTGGAGCGCA	Acar-UA*304	MH469005.1
P-19	AGTTTTGCGAGTTTCTGGCTGTGAGCTCCTGTCCGATGGGAGCGTCCGTGGTTCTGAACGGCACGGCTACGACGGGCGGGATTTCATCTCCTTTGACCTGGAATCCGGGAGATTCGTGGCGGCCGACAGCGCTGCTGAGATCACCAGGAGGCACTGGGAACATGAAGGGATCGTGGCTGAGAGGAAGACGAATTACCTGAAGCACGAGTGCCCGGAATGGCTCCAGAGACACGTCAGATATGGGCA	AGTTTTGCGAGTTTCTGGCTGTGAGCTCCTGTCCGATGGGAGCGTCCGTGGTTCTGAACGGCACGGCTACGACGGGCGGGATTTCATCTCCTTTGACCTGGAATCCGGGAGATTCGTGGCGGCCGACAGCGCTGCTGAGATCACCAGGAGGCACTGGGAACATGAAGGGATCGTGGCTGAGAGGAAGACGAATTACCTGAAGCACGAGTGCCCGGAATGGCTCCAGAGACACGTCAGATATGGGCAGAAGGAGCTGGAGCACA	Acar-UA*128	MH468857.1
M-20	CTTACAGCGGCTTTCTGGCTGTGACCTCCTGTCCGACGGGAGCGTCCGTGGAACCTACCGGAATGGCTACGACGGCCGGGATTTCATCTCCTTCGAGCTGGAATCCAGGAGATTCGTGGCGGCCGACAGCGCTGCTGAGATCACCAGGAGGCGCTGGGAACATGAAGGGACCGTGGCTGAGGGTTTGACGAATTACCTGAAGCACGAGTGCCCAGAACGGCTCCAGAAATATGTCAGATATGGGCA	CTTACAGCGGCTTTCTGGCTGTGACCTCCTGTCCGACGGGAGCGTCCGTGGAACCTACCGGAATGGCTACGACGGCCGGGATTTCATCTCCTTCGAGCTGGAATCCAGGAGATTCGTGGCGGCCGACAGCGCTGCTGAGATCACCAGGAGGCGCTGGGAACATGAAGGGACCGTGGCTGAGGGTTTGACGAATTACCTGAAGCACGAGTGCCCAGAACGGCTCCAGAAATATGTCAGATATGGGCAGAAGGAGCTGGAGCGCA	Acar-UA*466		OP524110
P-7	ATGGTTGCGAGTTATCGGCTGTGAGCTCCTGTCCGACGGGAGCGTCCGTGGATCCTACCGGTTTGGCTACGACGGGCGGGATTTCATCTCCTTTGAGCTGGGATCCGGGAGATTTGTGCCGGCCGACAGCGCTGCTGAGATCACCAGGAGGCGCTGGGAACATGATGGGACCGTGGCTGAGAGTTTGACAAATTACCTGAAGCACGAGTGCCCGGAGTGGCTCCAGAAATACGTCGGATACGGGCA	ATGGTTGCGAGTTATCGGCTGTGAGCTCCTGTCCGACGGGAGCGTCCGTGGATCCTACCGGTTTGGCTACGACGGGCGGGATTTCATCTCCTTTGAGCTGGGATCCGGGAGATTTGTGCCGGCCGACAGCGCTGCTGAGATCACCAGGAGGCGCTGGGAACATGATGGGACCGTGGCTGAGAGTTTGACAAATTACCTGAAGCACGAGTGCCCGGAGTGGCTCCAGAAATACGTCGGATACGGGCAGAAGGAGCTGGAGCGCA	Acar-UA*50	MH469111.1
M-25	CATACAGCGGCTTTATGGCTGTGACCTCCTGTCTGACGGGAGCATCCGTGGTTCTGATCGGTTTGGCTATGACGGGTGGGATTTCATCTCCTTCGAGCTGGGATCTGGGAGATTCGTGGCGGCCGACAGCGCTGCTGAGATCACCAGGAGGCTGTGGGAGCAGGAAGGGATCATGGCTGAGCATTGGACAAATTACCTTAAGTACGAGTGCCCAGAATTGCTCCAGAAATACGTTGGATATGGGCA	CATACAGCGGCTTTATGGCTGTGACCTCCTGTCTGACGGGAGCATCCGTGGTTCTGATCGGTTTGGCTATGACGGGTGGGATTTCATCTCCTTCGAGCTGGGATCTGGGAGATTCGTGGCGGCCGACAGCGCTGCTGAGATCACCAGGAGGCTGTGGGAGCAGGAAGGGATCATGGCTGAGCATTGGACAAATTACCTTAAGTACGAGTGCCCAGAATTGCTCCAGAAATACGTTGGATATGGGCAGAAGGAGCTGGAGCGCA	Acar-UA*400	MH469099.1
P-33	ATGGTTGCGAGTTATCGGCTGTGAGCTCCTGTCCGACGGGAGTGTCCGTGGAACCTTCCGGAATGGCTACGACGGGCGGGATTTCATCTCCTTCGACCTGGAATCCGGGAGATTCGTGCCGGCCGACAGCGCTGCTGAGATCACCAGGAGGCGCTGGGAACATGAAGGGATCGAGGCTGAGAGGAAGACGAATTACCTGAAGCACGTCTGCCCTGAATGGCTCCAGAGACACGTCAGATACGGGCA	ATGGTTGCGAGTTATCGGCTGTGAGCTCCTGTCCGACGGGAGTGTCCGTGGAACCTTCCGGAATGGCTACGACGGGCGGGATTTCATCTCCTTCGACCTGGAATCCGGGAGATTCGTGCCGGCCGACAGCGCTGCTGAGATCACCAGGAGGCGCTGGGAACATGAAGGGATCGAGGCTGAGAGGAAGACGAATTACCTGAAGCACGTCTGCCCTGAATGGCTCCAGAGACACGTCAGATACGGGCAGAAGGAGCTGGAGCGCA	Acar-UA*351	MH469055.1
P-15	ATGGTTGAAAGTTTATGGCTGTGACCTCCTGTCCAACGGGAGTGTCCATGGAACCTACCGGCACGGCTACGACGGGCGGGATTTCATCTCCCTTGACCTGGAATCCGGGAGATTCGTGCCGGCCGACAGCGGAGCTGAGATCACCAGGAGGCGCTGGGAACATGAAGGGATCGTGGCTGAGAGACAGACGAATTACCTGAAGCACGAGTGCCCGGAATGGCTCCAGAAATACGTCAGATATGGGCA	ATGGTTGAAAGTTTATGGCTGTGACCTCCTGTCCAACGGGAGTGTCCATGGAACCTACCGGCACGGCTACGACGGGCGGGATTTCATCTCCCTTGACCTGGAATCCGGGAGATTCGTGCCGGCCGACAGCGGAGCTGAGATCACCAGGAGGCGCTGGGAACATGAAGGGATCGTGGCTGAGAGACAGACGAATTACCTGAAGCACGAGTGCCCGGAATGGCTCCAGAAATACGTCAGATATGGGCAGAAGGAGCTGGAGCGCA	Acar-UA*288	MH468992.1
M-30	CATACAGCGGCTTTATGGCTGTGATCTCCTGTCTGACGGGAGCATCCGTGGTTCTGATCGGTTTGGCTATGACGGGTGGGATTTCATCTCCTTTGAGCTGGGATCCGGGAGATTCATGGCAGCTGACAGCACTGCTGAGATCACCAGGAGGCTGTGGGAGCAGGAAGGGATCATGGCTGAGCACTGGACAAATTACCTTAAGCACGAGTGCCCGGAATTGCTCCAGAAATACGTTGGATATGGGCA	CATACAGCGGCTTTATGGCTGTGATCTCCTGTCTGACGGGAGCATCCGTGGTTCTGATCGGTTTGGCTATGACGGGTGGGATTTCATCTCCTTTGAGCTGGGATCCGGGAGATTCATGGCAGCTGACAGCACTGCTGAGATCACCAGGAGGCTGTGGGAGCAGGAAGGGATCATGGCTGAGCACTGGACAAATTACCTTAAGCACGAGTGCCCGGAATTGCTCCAGAAATACGTTGGATATGGGCAGAAGGAGCTGGAGCGCA	Acar-UA*109	MH468838.1
P-12	CATACAGCGGCTTTATGGCTGTGACCTCCTGTCTGACGGGAGCATCCGTGGTTCTGATCGGTTTGGCTATGACGGGTGGGATTTCATCTCCTTTGAGCTGGGATCCGGGAGATTCATGGCAGCTGACAGCACTGCTGAGATCACCAGGAGGCTGTGGGAGCAGGAAGGGATCATGGCTGAGCACTGGACAAATTACCTTAAGCACGAGTGCCCGGAATTGCTCCAGAAATACATTGGATATGGGCA	CATACAGCGGCTTTATGGCTGTGACCTCCTGTCTGACGGGAGCATCCGTGGTTCTGATCGGTTTGGCTATGACGGGTGGGATTTCATCTCCTTTGAGCTGGGATCCGGGAGATTCATGGCAGCTGACAGCACTGCTGAGATCACCAGGAGGCTGTGGGAGCAGGAAGGGATCATGGCTGAGCACTGGACAAATTACCTTAAGCACGAGTGCCCGGAATTGCTCCAGAAATACATTGGATATGGGCAGAAGGAGCTGGAGCGCA	Acar-UA*54	MH469115.1
M-29	AGTGTTGCGAGTTATCGGCTGTGAGCTCCTGTCCGACGGGAGCGTCCGTGGTTCTGAACGGTTCGGCTACGACGGGCGGGATTTCATCTCCTTTGACCTGGAATCCGGGAGATTCATGGCGGCCGACAGCGCTGCTGAGATCACCAGGAGGCGCTGGGAACATGAAGGGATCGTGGCTGAGAGACAGACGAATTACCTGAAGCACGTCTGCCCTGAATGGCTCCAGAGACACGTCAGATACGGGCA	AGTGTTGCGAGTTATCGGCTGTGAGCTCCTGTCCGACGGGAGCGTCCGTGGTTCTGAACGGTTCGGCTACGACGGGCGGGATTTCATCTCCTTTGACCTGGAATCCGGGAGATTCATGGCGGCCGACAGCGCTGCTGAGATCACCAGGAGGCGCTGGGAACATGAAGGGATCGTGGCTGAGAGACAGACGAATTACCTGAAGCACGTCTGCCCTGAATGGCTCCAGAGACACGTCAGATACGGGCAGAAGGAGCTGGAGCGCA	Acar-UA*241	MH468954.1
P-13	AGTGTTGCGAGTTTACGGCTGTGAGCTCCTGTCCGACGGGAGCGTCCGTGGTTCTGAACGGTTCGGCTACGACGGGCGGGATTTCATCTCCTTTGACCTGGAATCCGGGAGATTCATGGCGGCCGACAGCGCTGCTGAGATCACCAGGAGGCGCTGGGAACATGAAGGGATCGTGGCTGAGAGACAGACGAATTACCTGAAGCACGAGTGCCCGGAATGGCTTCAGAAATACGTCGGATACGGGCA	AGTGTTGCGAGTTTACGGCTGTGAGCTCCTGTCCGACGGGAGCGTCCGTGGTTCTGAACGGTTCGGCTACGACGGGCGGGATTTCATCTCCTTTGACCTGGAATCCGGGAGATTCATGGCGGCCGACAGCGCTGCTGAGATCACCAGGAGGCGCTGGGAACATGAAGGGATCGTGGCTGAGAGACAGACGAATTACCTGAAGCACGAGTGCCCGGAATGGCTTCAGAAATACGTCGGATACGGGCAGAAGGAGCTAGAGCGCA	Acar-UA*250	MH468960.1
M-31	ACGGTTGACAGTTTACGGCTGTGAGCTCCTGTCCGACGGGAGTGTCCGTGGAACCTACCGGGATGGCTACGACGGGCGGGATTTCATCTCCTTTGACCTGGAATCCGGGAGATTTGTGGCGTCCGACAGCGCTGCTGAGATCACCAGGAGGCGCTGGGAACATGATGGGACCATGGCTGAGCGGCGGATGAATTACCTGAAGCACGTCTGCCCTGAATGGCTCCAGAGACACGTCAGATACGGGCA	ACGGTTGACAGTTTACGGCTGTGAGCTCCTGTCCGACGGGAGTGTCCGTGGAACCTACCGGGATGGCTACGACGGGCGGGATTTCATCTCCTTTGACCTGGAATCCGGGAGATTTGTGGCGTCCGACAGCGCTGCTGAGATCACCAGGAGGCGCTGGGAACATGATGGGACCATGGCTGAGCGGCGGATGAATTACCTGAAGCACGTCTGCCCTGAATGGCTCCAGAGACACGTCAGATACGGGCAGAAGGAGCTGGAGCGCA	Acar-UA*31	MH469010.1
U-43	CGCACAGCAGCTTTACAGCTGTGAGCTCCTCTCTGATGGGAGCATCCGTGGTTCTGATCGGTTTGGCTATGACGGGTGGGATTTCATCTCCTTCGAGCTGGGATCTGGGAGATTCGTGGTGGCCGACAGCGCTGCTGAGATCACCAGGAGGCGCTGGGAACATGATGGGATCGAGGCTGAGCATTGGACAAATTACCTGAAGCACGAGTGCCCGGAATGGCTCCAGAGACACGTCAGATACGGGCA	NA	Acar-UA*13	MH468859.1	OP524111
Seq73	TGCACAGCAGCTTTACAGCTGTGAGCTCCTCTCTGATGGGAGCATCCGTGGTTCTGATCGGTTTGGCTATGACGGGTGGGATTTCATCTCCTTCGAGCTGGGATCCGGGAGATTTGTGGCGGCCGACAGCGCTGCTGAGATCACCAGGAGGCGCTGGGAACATGATGGGACCGTGGCTGAGAGACAGACGAATTACCTGAAGCACGAGTGCCCGGAATGGCTGCAGAGACACGTCAGATATGGGCA	NA	Acar-UA*467		OP524112
P-5	ATGGTTGCGAGTTCATGGCTGTGACCTCCTGTCTGACGGGAGCGTCCGTGGAACCTACCGGGATGGCTACGACGGGCAGGATTTAATCTCCTTCGAGCTGGGATCCGGGAGATTCGTGGCGGCCGACAGCACTGCTGAGATCACCAGGAGGCGCTGGGAACACGATGGGATCGAGGCTGAGCATTGGACAAATTACCTGAAGCACGAGTGCCCGGAATGGCTCCAGAGACAGATATGGGCA	ATGGTTGCGAGTTCATGGCTGTGACCTCCTGTCTGACGGGAGCGTCCGTGGAACCTACCGGGATGGCTACGACGGGCAGGATTTAATCTCCTTCGAGCTGGGATCCGGGAGATTCGTGGCGGCCGACAGCACTGCTGAGATCACCAGGAGGCGCTGGGAACACGATGGGATCGAGGCTGAGCATTGGACAAATTACCTGAAGCACGAGTGCCCGGAATGGCTCCAGAGACAGATATGGGCAGAAGGAGCTGGAGCACA	Acar-UA*17	AF449698.1	OP524113
U-35	ATGGTTGCGAGTTCATGGCTGTGACCTCCTGTCTGACGGGACCGTCCGTGGAACCTACCGGGATGGCTACGACGGGCAGGATTTAATCTCCTTCGAGCTGGGATCCGGGAGATTCGTGGCGGCCGACAGCGCTGCTGAGATCACCAGGAGGCACTGGGAACACGACGGGATCGAGGCTGAGCATTGGACAAATTACCTGGAGCACGAGTGCCCGGAATGGCTCCAGAGACAGATATGGGCA	ATGGTTGCGAGTTCATGGCTGTGACCTCCTGTCTGACGGGACCGTCCGTGGAACCTACCGGGATGGCTACGACGGGCAGGATTTAATCTCCTTCGAGCTGGGATCCGGGAGATTCGTGGCGGCCGACAGCGCTGCTGAGATCACCAGGAGGCACTGGGAACACGACGGGATCGAGGCTGAGCATTGGACAAATTACCTGGAGCACGAGTGCCCGGAATGGCTCCAGAGACAGATATGGGCAGAAGGAGCTGGAGTACA	Acar-UA*21	AF449700.1	OP524114
M-28	ATGGTTGCGAGTTCATGGCTGTGACCTCCTGTCTGACGGGACCGTCCGTGGAACCTACCGGGATGGCTACGACGGGCAGGATTTAATCTCCTTCGAGCTGGGATCCGGGAGATTCGTGGCGGCCGACAGCGCTGCTGAGATCACCAGGAGGCACTGGGAACACGATGGGATCGAGGCTGAGCATTGGACAAATTACCTGGAGCACGAGTGCCCGGAATGGCTCCAGAGACAGATATGGGCA	NA	Acar-UA*18	AF449699.1	OP524115
P-4	ATGGTTGCGAGTTCATGGCTGTGACCTCCTGTCTGATGGGACCGTCCGTGGAACCTACCGGGATGGCTACGACGGGCAGGATTTAATCTCCTTCGAGCTGGGATCCGGGAGATTCGTGGCGGCCGACAGCGCTGCTGAGATCACCAGGAGGCACTGGGAACACGATGGGATCGAGGCTGAGCATTGGACAAATTACCTGGAGCACGAGTGCCCGGAATGGCTCCAGAGACAGATATGGGCA	ATGGTTGCGAGTTCATGGCTGTGACCTCCTGTCTGATGGGACCGTCCGTGGAACCTACCGGGATGGCTACGACGGGCAGGATTTAATCTCCTTCGAGCTGGGATCCGGGAGATTCGTGGCGGCCGACAGCGCTGCTGAGATCACCAGGAGGCACTGGGAACACGATGGGATCGAGGCTGAGCATTGGACAAATTACCTGGAGCACGAGTGCCCGGAATGGCTCCAGAGACAGATATGGGCAGAAGGAGCTGGAGTACA	Acar-UA*16	AF449697.1	OP524116
P-17	ATGGTTGCGAGTTCATGGCTGTGACCTCCTGTCTGACGGGACCGTCCGTGGAACCTACCGGGATGGCTACGACGGGCAGGATTTAATCTCCTTCGAGCTGGGATCCGGGAGATTCGTGGCGGCCGACAGCGCTGCTGAGATCACCAGGAGGCACTGGGAACACGATGGGATCGAGGCTGAGCATTGGACAAATTACCTGGAGCATGAGTGCCCGGAATGGCTCCAGAGACAGATATGGGCA	ATGGTTGCGAGTTCATGGCTGTGACCTCCTGTCTGACGGGACCGTCCGTGGAACCTACCGGGATGGCTACGACGGGCAGGATTTAATCTCCTTCGAGCTGGGATCCGGGAGATTCGTGGCGGCCGACAGCGCTGCTGAGATCACCAGGAGGCACTGGGAACACGATGGGATCGAGGCTGAGCATTGGACAAATTACCTGGAGCATGAGTGCCCGGAATGGCTCCAGAGACAGATATGGGCAGAAGGAGCTGGAGTACA	Acar-UA*468		OP524117
P-42	ATGGTTGCGAGTTCATGGCTGTGACCTCCTGTCTGACGGGACCGTCCGTGGAACCTACCGGGATGGCTACGACGGGCAGGATTTAATCTCCTTCGAGCTGGGATCCGGGAGATTCGTGGCGGCCGACAGCGCTGCTGAGATCACCAGGAGGCACTGGGAACACGACGGGATCGAGGCTGAGCATTGGACAAATTACCTGGAGCACAAGTGCCCGGAATGGCTCCAGAGACAGATATGGGCA	NA	Acar-UA*22	AF449701.1	OP524118
U-46	TGCAGCGGCTTTATGGCTGTGACCTCCTGTCCGATGGGAGCATCCATGGATACATCTGGGGTGGCTGCGGCAGGCGGGATTTCCTCTCCTTTGACCTGGGATCCAGGAGATTCATGGCGGCCAACAGTGCTGCTGAGATCACCAGGAGGTGCTGGGAACACGAAGGGATCGAGGCTGAGAGGCAGACAAATTACCTGAAGCACGTCTGCCCAGAATGGCTCCAGAAGTACATTGGATACGGGCA	NA	Acar-UA*14	AF449696.1	OP524119
U-1	NA	CATGCAGTGGGTTTCTGGCTGTGAGCTCCTGTCTGACAGGAGCATCCGTGGATCCTCACAGTTCAGCTACGATGGGTGGGATTTCATCTCCTTTGACCTGGAATCCAGGAGATTCGTGGCCGCCGACAGATCACCAGGAGGCGCTGGGAACATGACAGGACCGTGGCTGAGTATCGGACGAATTACCTGAAGCACATCTGCCCGGAATCACTCCAGAAATACGTTGGATATGGGCAGAAGGAGCTGGAGCGCA	Acar-UA*469		OP524120
