# Supplementary material for: Improved haplotype resolution of highly duplicated MHC genes in a long-read genome assembly using MiSeq amplicons
Source: PeerJ. 2023 Jul 12;11:e15480. doi: 10.7717/peerj.15480 (PMC10349553; doi:10.7717/peerj.15480)
Supplement: Supplemental Information 9 — List of MHC-IIB (exon 2) amplicon alleles in the focal individual, corresponding nucleotide sequences obtained with both MHC-IIB primer pair combinations (PP1 (trimmed length sequences) and PP5) and matching MHC-IIB allele in GeneBank (Sequence ID provided for each MHC-IIB amplicon allele). [file peerj-11-15480-s009.xlsx]

## Sheet: Sheet1
Name given to MHC-IIB amplicon allele found in the focal individual (Mellinger et al.)	MHC-IIB sequences obtained with primer pair PP1 (trimmed length: 264-270 bp)	MHC-IIB sequences obtained with primer pair PP5 (length: 250-256 bp)	Corresponding MHC-IIB allele in GeneBank	Sequence ID
U-1	GGGTGTTCCAGCACGTGTTTAAGGGCGAGTGTCACTTCATTAACGGCACGGAGAAGGTGAGGTACGTGCAGAGGTTCATCTACAACCGTGTGATGTGGGCGATGTTCGACAGCGACGTGGGGCACTTCGTGGGGCTCACTCCCTTAGGGGAGAAATGGGCCCAGTACTGGAACAGCAACCCAGATCTCATGGAGCGCATTCGGAGCGAGGTGGACAGCTTATGCAGGCGCAACCACCCGACTGCTGCCCCGTTCAGCGTGCAGCGCCGTG	CCAGCACGTGTTTAAGGGCGAGTGTCACTTCATTAACGGCACGGAGAAGGTGAGGTACGTGCAGAGGTTCATCTACAACCGTGTGATGTGGGCGATGTTCGACAGCGACGTGGGGCACTTCGTGGGGCTCACTCCCTTAGGGGAGAAATGGGCCCAGTACTGGAACAGCAACCCAGATCTCATGGAGCGCATTCGGAGCGAGGTGGACAGCTTATGCAGGCGCAACCACCCGACTGCTGCCCCGTTCAGCGTGCAG	Acar-DAB*1	OP524014
M-3	GGGTGTTCCAGCACATGTTTGTGTCAGAGTGTCACTTCATTAACGGCACGGAGAAGGTGAGGTACGTGCAGAGGTACTTCTACAACCGAATGGAGTGGGCGTTATTTGACAGCGACGTGGGGCACTACGTGGGGTTCACCCCCTTTGGGGAGAAAAATGCCCAGTACTGGAACAGCAACCCAGAAGGGATGGAGTACACACGGGGTCAAGTGGACACAGTTTGCCGGCACAACTACCCGATTGCTGCCCCGTTCAGCGTGCAGCGCCGAG	CCAGCACATGTTTGTGTCAGAGTGTCACTTCATTAACGGCACGGAGAAGGTGAGGTACGTGCAGAGGTACTTCTACAACCGAATGGAGTGGGCGTTATTTGACAGCGACGTGGGGCACTACGTGGGGTTCACCCCCTTTGGGGAGAAAAATGCCCAGTACTGGAACAGCAACCCAGAAGGGATGGAGTACACACGGGGTCAAGTGGACACAGTTTGCCGGCACAACTACCCGATTGCTGCCCCGTTCAGCGTGCAG	Acar-DAB*2	OP524015
U-7	GGGTGTTCCAGGAGATATCAAAGTCCGAGTGTTACTTCATTAATGGCACGGAGAAGGTGAGGTACATAGAGAGGTACATCTACAACCGTGTGGAGTGGGCGATGTTTGACAGCGACGTGGGGCACTACGTGGGGTTCACTCCCTTTGGGGAGAAATGGGCCTGGCACTGGAACAACAAACCGAAATGGATGGAGTACACACGGACTGCGGTGAACTGGTTCTGCCGGGTCTGGTAAAAGAAAGCTGCCCCCTTCACCGTGCAGCGCCGAG	CCAGGAGATATCAAAGTCCGAGTGTTACTTCATTAATGGCACGGAGAAGGTGAGGTACATAGAGAGGTACATCTACAACCGTGTGGAGTGGGCGATGTTTGACAGCGACGTGGGGCACTACGTGGGGTTCACTCCCTTTGGGGAGAAATGGGCCTGGCACTGGAACAACAAACCGAAATGGATGGAGTACACACGGACTGCGGTGAACTGGTTCTGCCGGGTCTGGTAAAAGAAAGCTGCCCCCTTCACCGTGCAG	Acar-DAB*3	OP524099
M-9	GGGTGTTTCAGAATTTGCAAAAGTTCGAGTGTCACTTCATTAACGGCACGGAGAAGGTGAGGTTCGTGCACAGGTTCATCTACAACCGGCTGCAGCAGGTGATATTTGACAGCAACGTGGGGCACTACGTGGGGTTTACCCCCTATGGGGAGAAACAGGCCCAGTGCTGGAACAGCAACCCAGATATCCTGGAGAGCACGCGGACTGCGGTAGACTGGTACTGCCGGCACAACTACGAGCTTGATGCCCCGTTCAGTGTGCACCGCCGAG	TCAGAATTTGCAAAAGTTCGAGTGTCACTTCATTAACGGCACGGAGAAGGTGAGGTTCGTGCACAGGTTCATCTACAACCGGCTGCAGCAGGTGATATTTGACAGCAACGTGGGGCACTACGTGGGGTTTACCCCCTATGGGGAGAAACAGGCCCAGTGCTGGAACAGCAACCCAGATATCCTGGAGAGCACGCGGACTGCGGTAGACTGGTACTGCCGGCACAACTACGAGCTTGATGCCCCGTTCAGTGTGCAC	Acar-DAB*4	OP524016
U-10	GGGTGTTCCAATGGATGGGAAGGTTCGAGTGTTACTACATTAATGGCACAGAGAAGGTGAGGTACGTGGCGAGAGGCATCTACAACCGGGAGGAGTACGCGATGTTCGACAGCGACGTGGGGCACTTCGTGGGGTTCAACCCCTATGGGGAGAAACAGGCCCAGTCCAAGAACAGCGACTCAGAACAGATGGAGATTTATCGGACTGCGGTGGACACGTACTGCCGGCACAACTACAGATTGGCCGCCCCGTACCTCCCGGGGCACCGAG	CCAATGGATGGGAAGGTTCGAGTGTTACTACATTAATGGCACAGAGAAGGTGAGGTACGTGGCGAGAGGCATCTACAACCGGGAGGAGTACGCGATGTTCGACAGCGACGTGGGGCACTTCGTGGGGTTCAACCCCTATGGGGAGAAACAGGCCCAGTCCAAGAACAGCGACTCAGAACAGATGGAGATTTATCGGACTGCGGTGGACACGTACTGCCGGCACAACTACAGATTGGCCGCCCCGTACCTCCCGGGG	Acar-DAB*5	OP524017
P-11	GGGTGTTTCAGAATTTGCAAAAGTTCGAGTGTCACTTCATTAACGGCACGGAGAAGGTGAGGTTCGTGCACAGGTTCATCTACAACCGGCTGCAGCAGGTGATATTTGACAGCGACGTGGGGCACTACGTGGGGTTTACCCCCTATGGGGAGAAACAGGCCCAGTGCTGGAACAGCAACCCAGATATCCTGGAGAACACGCGGACTGCGGTAGACTGGTACTGCCGGCACAACTACGAGCTTGATGCCCCGTTCAGTGTGCACCGCCGAG	TCAGAATTTGCAAAAGTTCGAGTGTCACTTCATTAACGGCACGGAGAAGGTGAGGTTCGTGCACAGGTTCATCTACAACCGGCTGCAGCAGGTGATATTTGACAGCGACGTGGGGCACTACGTGGGGTTTACCCCCTATGGGGAGAAACAGGCCCAGTGCTGGAACAGCAACCCAGATATCCTGGAGAACACGCGGACTGCGGTAGACTGGTACTGCCGGCACAACTACGAGCTTGATGCCCCGTTCAGTGTGCAC	Acar-DAB*6	OP524018
M-1 (PP1)	GGGTGTTCCAGTTTATGGGTAAGTTCGAGTGTCACTTCATTAACGGCACGGAGAAGGTGAGGTTCGTGCACAGGTACATCTATAACCGGGAGCAGCTCACGATGTTCGACAGCGACCTGGGGCACTTCGTGGGGTTCACCCCCTTAGGGGAGAAATGGGCCCGGGACTGGAACAGCAATCCAGATCTCATGGAGACACAGCAAACTGCGGTGGACATAGTTTGCCGGCCCAACTACGAGATTTCTGTCCCATTCATTGTGGACTGCAGAG	NA	Acar-DAB*7	OP524019
U-13	GGGTGTTCCAGGAGATGATGAAGGGAGAGTGTTACTTCCTTAACGGCACGGAGAAGGTGAGATTGGTGGTGAGGCAAATCTACAACCGAGAAGAGTACGCGGTGTTCGACAGCGACGTGGGACACTACGTGGGGTTCACCCCCTATGGGGAGAAACAGGCCCGGTACTGGAACAGCAACCCAGATTTCATGGAGCGCATGCGGACTCAGGTGGACACCTGCCGGCACAGCTACAGGGTTAATGCCCCGTTCAGCGTGCAGCGCCAAG	CCAGGAGATGATGAAGGGAGAGTGTTACTTCCTTAACGGCACGGAGAAGGTGAGATTGGTGGTGAGGCAAATCTACAACCGAGAAGAGTACGCGGTGTTCGACAGCGACGTGGGACACTACGTGGGGTTCACCCCCTATGGGGAGAAACAGGCCCGGTACTGGAACAGCAACCCAGATTTCATGGAGCGCATGCGGACTCAGGTGGACACCTGCCGGCACAGCTACAGGGTTAATGCCCCGTTCAGCGTGCAG	Acar-DAB*8	OP524020
P-14	GGGTGTTCCAGAAGTTTAGTACATCCGAGTGTCACTTCATTAACGGCACGGAGAAGGTGAGGTACATAGAGAGGAACATCTTCAACCGTGTCGAGGACATGATGTTCGACAGCGACGTGGGGCACTTCGTGGGGTTCACCCCCTATGGGGAGAAACAGGCCCGGAACTGGAACAGCAACCCAAAATGGATGGAGGACATAAGGGCTGCTGTGTACACGTACTGCCGGCACAACTACCCGATTGTTGCCCCGTTCAGCGTGCAGCGCCGAG	CCAGAAGTTTAGTACATCCGAGTGTCACTTCATTAACGGCACGGAGAAGGTGAGGTACATAGAGAGGAACATCTTCAACCGTGTCGAGGACATGATGTTCGACAGCGACGTGGGGCACTTCGTGGGGTTCACCCCCTATGGGGAGAAACAGGCCCGGAACTGGAACAGCAACCCAAAATGGATGGAGGACATAAGGGCTGCTGTGTACACGTACTGCCGGCACAACTACCCGATTGTTGCCCCGTTCAGCGTGCAG	Acar-DAB*9	OP524021
M-16	GGGTGTTCCAATGGATGGGAAGGTTTGAGTGTTACTACATTAATGGCACAGAGAAGGTGAGGTACGTGGCTAGAGGCATCTACAACTGGGAGGAGTACGCGATGTTCGACAGCGACGTGGGGCACTTCGTGGGGTTCAACCCCTATGGGGAGAAACAGGCCCAGGACTGGAACAGCGACCCAGAACAGATGGAGATTTATCGGACTGCGGTGGACACGTACTGCCGGCACAACTACAGATTGGCCGCCCCGTACCTCCCGGGGCGCCGAG	CCAATGGATGGGAAGGTTTGAGTGTTACTACATTAATGGCACAGAGAAGGTGAGGTACGTGGCTAGAGGCATCTACAACTGGGAGGAGTACGCGATGTTCGACAGCGACGTGGGGCACTTCGTGGGGTTCAACCCCTATGGGGAGAAACAGGCCCAGGACTGGAACAGCGACCCAGAACAGATGGAGATTTATCGGACTGCGGTGGACACGTACTGCCGGCACAACTACAGATTGGCCGCCCCGTACCTCCCGGGG	Acar-DAB*10	OP524022
P-17	GGGTGTTCCAATGGATGGGAAAGTTCGAGTGTTACTACATTAATGGCACAGAGAAGGTGAGGTACGTGGCTAGAGGCATCTACAACTGGGAGGAGTACGCGATGTTCGACAGCGACGTGGGGCACTTCGTGGGGTTCAACCCCTATGGGGAGAAACAGGCCCAGGACTGGAACAGCGACCCAGAACAGATGGAGATTTATCGGACTGCGGTGGACACGTACTGCCGGCACAACTACAGATTGGCCGCCCCGTACCTCCCGGGGCGCCGAG	CCAATGGATGGGAAAGTTCGAGTGTTACTACATTAATGGCACAGAGAAGGTGAGGTACGTGGCTAGAGGCATCTACAACTGGGAGGAGTACGCGATGTTCGACAGCGACGTGGGGCACTTCGTGGGGTTCAACCCCTATGGGGAGAAACAGGCCCAGGACTGGAACAGCGACCCAGAACAGATGGAGATTTATCGGACTGCGGTGGACACGTACTGCCGGCACAACTACAGATTGGCCGCCCCGTACCTCCCGGGG	Acar-DAB*11	OP524023
P-18	GGGTGTTCCAGTTTATGTTTAAGTTCGAGTGTCACTTCATTAACGGCACGGAGAAGGTGAGGTTCGTGCAGAGGAACATCTACAACCGTGTGGAGTTCGTGATGTTCGACAGCGACGTGGGGCACTACGTGGGGTTCACCCCCTATGGGGAGAAATGGGCCCAGTACTGGAACAGCAACCCAGAATGGATGGAGTACAAACGGGCTGCGGTGGACAGGCTCTGCCGGCACAACTACCCGATTGCTGCCCCGTTCAGCGTGCAGCGCCGAG	CCAGTTTATGTTTAAGTTCGAGTGTCACTTCATTAACGGCACGGAGAAGGTGAGGTTCGTGCAGAGGAACATCTACAACCGTGTGGAGTTCGTGATGTTCGACAGCGACGTGGGGCACTACGTGGGGTTCACCCCCTATGGGGAGAAATGGGCCCAGTACTGGAACAGCAACCCAGAATGGATGGAGTACAAACGGGCTGCGGTGGACAGGCTCTGCCGGCACAACTACCCGATTGCTGCCCCGTTCAGCGTGCAG	Acar-DAB*12	OP524024
U-20	GGGTGTTCCAGCACATGTTTAAGGGCGAGTGTCACTTCCTTAACGGCACGGAGAAGGTGAGGTACGTGCAGAGGTTCATCTACAACCGTGTGATGTGGGCGATGTTCGACAGCGACGTGGGGCACTTCGTGGGGCTCACTCCCTTAGGGGAGAAATGGGCCCAGTACTGGAACAGCAACCCAGATCTCATGGAGCGCATTCGGAGCGAGGTGGACAGCTTATGCAGGCGCAACTACCCGACTGCTGCCCCGTTCAGCGTGCAGCGCCGTG	CCAGCACATGTTTAAGGGCGAGTGTCACTTCCTTAACGGCACGGAGAAGGTGAGGTACGTGCAGAGGTTCATCTACAACCGTGTGATGTGGGCGATGTTCGACAGCGACGTGGGGCACTTCGTGGGGCTCACTCCCTTAGGGGAGAAATGGGCCCAGTACTGGAACAGCAACCCAGATCTCATGGAGCGCATTCGGAGCGAGGTGGACAGCTTATGCAGGCGCAACTACCCGACTGCTGCCCCGTTCAGCGTGCAG	Acar-DAB*13	OP524025
U-23	GGGTCTTCCAGTTTCTGGGAAAAACAGAGTGTCATTTCATTAACGGCACCGAGCAAGTAAGGTTCCTGGACAGGTTCATCTACAACCGGGAGCAGTACGTGATGTTCGACAGCGACGTGGGGCACTTTATGGGGTTCACCCCGAATGGGGAGAAGCTGGCCCGGTACTGGAACAGCGACTCGGAAACACTGGAGCGTTATTGGAATGGGGTAGACACTTACTGCCGGCAAAACTACGAGGCGTTAAGCCCGTTCCTGGTGGACCGCAGAG	CCAGTTTCTGGGAAAAACAGAGTGTCATTTCATTAACGGCACCGAGCAAGTAAGGTTCCTGGACAGGTTCATCTACAACCGGGAGCAGTACGTGATGTTCGACAGCGACGTGGGGCACTTTATGGGGTTCACCCCGAATGGGGAGAAGCTGGCCCGGTACTGGAACAGCGACTCGGAAACACTGGAGCGTTATTGGAATGGGGTAGACACTTACTGCCGGCAAAACTACGAGGCGTTAAGCCCGTTCCTGGTGGAC	Acar-DAB*14	OP524026
M-24	GGGTGTTCCAGTTTATGGTTAAGAATGAGTGTTACTTCATTAACGGCACGGAGAAGGTGAGATACGTTCAGACGGGCATCTACAACCGCGAGCAGCAGGCGATGTTCGACAGCGACGTGGGGCACTATGTGGGGTTCACCCCCTTAGGGGAGAAACACGCCCAGAACTTCAACAGCAACCTGGAAATACTGGAGCAAAAACGAACTGCTTTGGACTGGTTCTGCCGGCACAACTACGAGATTTCTCTTCCGTTCCTCGTGGATCGACGAG	CCAGTTTATGGTTAAGAATGAGTGTTACTTCATTAACGGCACGGAGAAGGTGAGATACGTTCAGACGGGCATCTACAACCGCGAGCAGCAGGCGATGTTCGACAGCGACGTGGGGCACTATGTGGGGTTCACCCCCTTAGGGGAGAAACACGCCCAGAACTTCAACAGCAACCTGGAAATACTGGAGCAAAAACGAACTGCTTTGGACTGGTTCTGCCGGCACAACTACGAGATTTCTCTTCCGTTCCTCGTGGAT	Acar-DAB*15	OP524027
M-27	GGGTGTTCCAGGAGATGATGAAGGGAGAGTGTTACTTCCTTAACGGCACGGAGAAGGTGAGATTGGTGGTGAGGCAAATCTACAACCGAGAAGAGTACGCGATGTTCGACAGCGACGTGGGACACTACGTGGGGTTCACCCCTTATGGGGAGAAACAGGCCCGGTACTGGAACAGCAACCCAGATTTCATGGAGCGCATGCGGACTCAGGTGGACACCTGCCGGCACAACTACAGGGTTAATGCCCCGTTCAGCGTGCAGCGCCAAG	CCAGGAGATGATGAAGGGAGAGTGTTACTTCCTTAACGGCACGGAGAAGGTGAGATTGGTGGTGAGGCAAATCTACAACCGAGAAGAGTACGCGATGTTCGACAGCGACGTGGGACACTACGTGGGGTTCACCCCTTATGGGGAGAAACAGGCCCGGTACTGGAACAGCAACCCAGATTTCATGGAGCGCATGCGGACTCAGGTGGACACCTGCCGGCACAACTACAGGGTTAATGCCCCGTTCAGCGTGCAG	Acar-DAB*16	OP524028
P-30	GGGTGTTCCAATGGATGGGAAAGTTCGAGTGTTACTACATTAATGGCACAGAGAAGGTGAGGTACGTGGCGAGAGGCATCTACAACCGGGAGGAGTACGCGATGTTCGACAGCGACGTGGGGCACTTCGTGGGGTTCAACCCCTATGGGGAGAAACAGGCCCAGTCCAAGAACAGCGACCCAGAACAGATGGAGATTTATCGGACTGCGGTGGACACGTACTGCCGGCACAACTACAGATTGGCCGCCCCGTACCTCCCGGGGCGCCGAG	CCAATGGATGGGAAAGTTCGAGTGTTACTACATTAATGGCACAGAGAAGGTGAGGTACGTGGCGAGAGGCATCTACAACCGGGAGGAGTACGCGATGTTCGACAGCGACGTGGGGCACTTCGTGGGGTTCAACCCCTATGGGGAGAAACAGGCCCAGTCCAAGAACAGCGACCCAGAACAGATGGAGATTTATCGGACTGCGGTGGACACGTACTGCCGGCACAACTACAGATTGGCCGCCCCGTACCTCCCGGGG	Acar-DAB*17	OP524029
P-31	GGGTGTTCCAGCACGTGTTTAAGGGCGAGTGTCACTTCATTAACGGCACGGAGAAGGTGAGGTACGTGCAGAGGTTCATCTACAACCGTGTGATGTGGGCGATGTTCGACAGCGACGTGGGGCACTTCGTGGGGCTCACTCCCTTAGGGGAGAAATGGGCCCAGTACTGGAACAGCAACCCAGATCTCATGGAGCGCATTCGGAGCGAGGTGGACAGCTTATGCAGGCGACACCACCCGACTGCTGCCCCGTTCAGCGTGCAGCGCCGTG	CCAGCACGTGTTTAAGGGCGAGTGTCACTTCATTAACGGCACGGAGAAGGTGAGGTACGTGCAGAGGTTCATCTACAACCGTGTGATGTGGGCGATGTTCGACAGCGACGTGGGGCACTTCGTGGGGCTCACTCCCTTAGGGGAGAAATGGGCCCAGTACTGGAACAGCAACCCAGATCTCATGGAGCGCATTCGGAGCGAGGTGGACAGCTTATGCAGGCGACACCACCCGACTGCTGCCCCGTTCAGCGTGCAG	Acar-DAB*18	OP524030
P-32	GGGTGTTCCAGCACGTGTTTAAGGGCGAGTGTCACTTCATTAACGGCACGGAGAAGGTGAGGTACGTGCAGAGGTTCATCTACAACCGTGTGATGTGGGCGATGTTCGACAGCGACGTGGGGCACTTCGTGGGGCTCACTCCCTTAGGGGAGAAATGAGCCCAGTACTGGAAGAGCAACCCAGATCTCATGGAGCGCATTCGGAGCGAGGTGGACAGCTTATGCAGGCGCAACCACCCGACTGCTGCCCCGTTCAGCGTGCAGCGCCGTG	CCAGCACGTGTTTAAGGGCGAGTGTCACTTCATTAACGGCACGGAGAAGGTGAGGTACGTGCAGAGGTTCATCTACAACCGTGTGATGTGGGCGATGTTCGACAGCGACGTGGGGCACTTCGTGGGGCTCACTCCCTTAGGGGAGAAATGAGCCCAGTACTGGAAGAGCAACCCAGATCTCATGGAGCGCATTCGGAGCGAGGTGGACAGCTTATGCAGGCGCAACCACCCGACTGCTGCCCCGTTCAGCGTGCAG	Acar-DAB*19	OP524100
U-33	GGGTGTTCCAGCAGATGGTGAAGGCCGAGTGTCAGTTCATTAATGGCACGGAGGAGGTGAGGTTCGTGGGGAGGCGCATCTACAACCGGGAGGAGTTCTTCAACTTTGACAGCGACGTGGGGCACTTTGTGGGGTTCACCCCCTTTGGGGAGAAGGAGGCCAGGAAATATAACAGCAACCCGGATAGACTGGAGTATGACCGGACTGCGGTGGACTGGTTCTGCCGAGGCTGGTACAAGTATGTTGCTTCATTCACCCTGCAACACCGAG	CCAGCAGATGGTGAAGGCCGAGTGTCAGTTCATTAATGGCACGGAGGAGGTGAGGTTCGTGGGGAGGCGCATCTACAACCGGGAGGAGTTCTTCAACTTTGACAGCGACGTGGGGCACTTTGTGGGGTTCACCCCCTTTGGGGAGAAGGAGGCCAGGAAATATAACAGCAACCCGGATAGACTGGAGTATGACCGGACTGCGGTGGACTGGTTCTGCCGAGGCTGGTACAAGTATGTTGCTTCATTCACCCTGCAA	Acar-DAB*20	OP524031
P-34	GGGTGTTCCAGCACATGGCAAAGTTCGAGTGTCACTTCATTAACGGCACGGAGAAGGTGAGGTACGTGCAGAGGAACATCTACAATCGAGAGCAGCTCCTGATGTTTGACAGCGACGTGGGGCACTACGTGGGGTTCACCCCCTATGGGGAGAAACAGGCCCAGTACTGGAACAGCAACCCGGAACTGATGGAGTACAGACGGGGTCAAGTGGACACGTACTGCCGGCACAACTACAAGATTTCTGTCCCATTCATCGTGGATCGCCGAG	CCAGCACATGGCAAAGTTCGAGTGTCACTTCATTAACGGCACGGAGAAGGTGAGGTACGTGCAGAGGAACATCTACAATCGAGAGCAGCTCCTGATGTTTGACAGCGACGTGGGGCACTACGTGGGGTTCACCCCCTATGGGGAGAAACAGGCCCAGTACTGGAACAGCAACCCGGAACTGATGGAGTACAGACGGGGTCAAGTGGACACGTACTGCCGGCACAACTACAAGATTTCTGTCCCATTCATCGTGGAT	Acar-DAB*21	OP524032
P-35	GGGTGTTTCAGAATTTGCAAAAGTTCGAGTGTCACTTCATTAACGGCACGGAGAAGGTGAGGTTCGTGCACAGGTTCATCTACAACCGGCTGCAGCAGGTGATATTTGACAGCGACGTGGGGCACTACGTGGGGTTTACCCCCTATGGGGAGAAACAGGCCCAGTGCTGGAACAGCAACCCAGATATCCTGGAGAGCACGCGGACTGCGGTAGACTGGTACTGCCGGCACAACTACGAGCTTGATGCCCCGTTCAGTGTGCACCGCCGAG	TCAGAATTTGCAAAAGTTCGAGTGTCACTTCATTAACGGCACGGAGAAGGTGAGGTTCGTGCACAGGTTCATCTACAACCGGCTGCAGCAGGTGATATTTGACAGCGACGTGGGGCACTACGTGGGGTTTACCCCCTATGGGGAGAAACAGGCCCAGTGCTGGAACAGCAACCCAGATATCCTGGAGAGCACGCGGACTGCGGTAGACTGGTACTGCCGGCACAACTACGAGCTTGATGCCCCGTTCAGTGTGCAC	Acar-DAB*22	OP524033
P-36	GGGTGTTCCAGGAGATGTTTAAATTTGAGTGTTACTACACTAACGGCACGGAGAAGGTGAGGTTGGTGGTGAGGAACTTCTACAACCGTGTGGAGTACGTGATGTATGACAGCGACGTGGGGCATCACGTGGGGTTCACCCCCTTTGGGGAGAAGGTGGCCAGGAGATGGAACAACGACCCAGATTTCATGGAGCTGAGAAGGGGTGAGGTGGACACAGTTTGCCGGCACAACTACAAGATTGATGCCCCGTTCAGCGTGCAGCGCCGAG	CCAGGAGATGTTTAAATTTGAGTGTTACTACACTAACGGCACGGAGAAGGTGAGGTTGGTGGTGAGGAACTTCTACAACCGTGTGGAGTACGTGATGTATGACAGCGACGTGGGGCATCACGTGGGGTTCACCCCCTTTGGGGAGAAGGTGGCCAGGAGATGGAACAACGACCCAGATTTCATGGAGCTGAGAAGGGGTGAGGTGGACACAGTTTGCCGGCACAACTACAAGATTGATGCCCCGTTCAGCGTGCAG	Acar-DAB*23	OP524034
U-38	GGGTGTTCCAGCACGTGTTTAAGGGCGAGTGTCACTTCATTAACGGCACGGAGAAGGTGAGGTACGTGCAGAGGTTCATCTACAACCGTGTGATGTGGGCGATGTTCGACAGCGACGTGGGGCACTTCGTGGGGCTCACTCCCTTAGGGGAGAAATGGGCCCAGTACTGGAACAGCAACCCAGATCTCATGGAGCGCATTCGGAGCGAGGTGGACAGCTTATGCAGGCGCAACTACCCGACTGCTGCCCCGTTCAGCGTGCAGCGCCGTG	CCAGCACGTGTTTAAGGGCGAGTGTCACTTCATTAACGGCACGGAGAAGGTGAGGTACGTGCAGAGGTTCATCTACAACCGTGTGATGTGGGCGATGTTCGACAGCGACGTGGGGCACTTCGTGGGGCTCACTCCCTTAGGGGAGAAATGGGCCCAGTACTGGAACAGCAACCCAGATCTCATGGAGCGCATTCGGAGCGAGGTGGACAGCTTATGCAGGCGCAACTACCCGACTGCTGCCCCGTTCAGCGTGCAG	Acar-DAB*24	OP524035
P-39	GGGTGTTCCAGCACGTGTTTAAGGGCGAGTGTCACTTCATTAACGGCACGGAGAAGGTGAGGTACGTGCAGAGGTTCATCTACAACCGTGTGATGTGGGCGATGTTCGACAGCGACGTGGGGCACTTCGTGGGGCTCACTTCCTTAGGGGAGAAATGGGCCCAGTACTGGAACAGCAACCCAGATCTCATGGAGCGCATTCGGAGCGAGGTGGACAGCTTATGCAGGCGCAACCACCCGACTGCTGCCCCGTTCAGCGTGCAGCGCCGTG	CCAGCACGTGTTTAAGGGCGAGTGTCACTTCATTAACGGCACGGAGAAGGTGAGGTACGTGCAGAGGTTCATCTACAACCGTGTGATGTGGGCGATGTTCGACAGCGACGTGGGGCACTTCGTGGGGCTCACTTCCTTAGGGGAGAAATGGGCCCAGTACTGGAACAGCAACCCAGATCTCATGGAGCGCATTCGGAGCGAGGTGGACAGCTTATGCAGGCGCAACCACCCGACTGCTGCCCCGTTCAGCGTGCAG	Acar-DAB*25	OP524036
P-40	GGGTGTTCCAGGAGATGATGAAGGGAGAGTGTTACTTCCTTAACGGCACGGAGAAGGTGATATTGGTGGTGAGGCAAATCTACAACCGAGAAGAGTACGCGATGTTCGACAGCGACGTGGGACACTACGTGGGGTTCACCCCTTATGGGGAGAAACAGGCCCGGTACTGGAACAGCAACCCAGATTTCATGGAGCGCATGCGGACTCAGGTGGACACCTGCCGGCACAACTACAGGGTTAATGCCCCGTTCAGCGTGCAGCGCCAAG	CCAGGAGATGATGAAGGGAGAGTGTTACTTCCTTAACGGCACGGAGAAGGTGATATTGGTGGTGAGGCAAATCTACAACCGAGAAGAGTACGCGATGTTCGACAGCGACGTGGGACACTACGTGGGGTTCACCCCTTATGGGGAGAAACAGGCCCGGTACTGGAACAGCAACCCAGATTTCATGGAGCGCATGCGGACTCAGGTGGACACCTGCCGGCACAACTACAGGGTTAATGCCCCGTTCAGCGTGCAG	Acar-DAB*26	OP524037
U-45	GGGTGTTCCAGAAGTTTAGTACATCCGAGTGTCACTTCATTAACGGCACGGAGAAGGTGAGGTACATAGAGAGGTACATCTACAACCGTGTCGAGGACATGATGTTCGACAGCGACGTGGGGCACTTCGTGGGGTTCACCCCCTATGGGGAGAAACAGGCCCGGAACTGGAACAGCAACCCAAAATGGATGGAGGACATAAGGGCTGCTGTGTACACGTACTGCCGGCACAACTACCCGATTGTTGCCCCGTTCAGCGTGCAGCGCCGAG	CCAGAAGTTTAGTACATCCGAGTGTCACTTCATTAACGGCACGGAGAAGGTGAGGTACATAGAGAGGTACATCTACAACCGTGTCGAGGACATGATGTTCGACAGCGACGTGGGGCACTTCGTGGGGTTCACCCCCTATGGGGAGAAACAGGCCCGGAACTGGAACAGCAACCCAAAATGGATGGAGGACATAAGGGCTGCTGTGTACACGTACTGCCGGCACAACTACCCGATTGTTGCCCCGTTCAGCGTGCAG	Acar-DAB*27	OP524038
P-49	GGGTGTTCCAGGAGATGGGAAAGGTCGAGTGTCACTTCATTAACGGCACGGAGAAGGTGAGGTTCGTGCAGAGGAACATCTACAACCGTGTGGAGGACGTGAGGTTCGACAGCGACGTGGGGCACCACGTGGGGTTCACCCCCTATGGGGAGAAATGCGCCCAGGACTGGAACAGCAACCCGGAACTGATGGAGTACAAACGGGCTGCGGTGGACACGGTCTGCCGGCACAACTACCCGATTGTTGCCCCGTTCAGCGTGCAGCGCCGAG	CCAGGAGATGGGAAAGGTCGAGTGTCACTTCATTAACGGCACGGAGAAGGTGAGGTTCGTGCAGAGGAACATCTACAACCGTGTGGAGGACGTGAGGTTCGACAGCGACGTGGGGCACCACGTGGGGTTCACCCCCTATGGGGAGAAATGCGCCCAGGACTGGAACAGCAACCCGGAACTGATGGAGTACAAACGGGCTGCGGTGGACACGGTCTGCCGGCACAACTACCCGATTGTTGCCCCGTTCAGCGTGCAG	Acar-DAB*28	OP524039
U-50	GGGTGTTCCAGTTTATGGGTAAGTTCGAGTGTCACTTCATTAACGGCACGGAGAAGGTGAGGTTCGTGCACAGGTACATCTATAACCGGGAGCAGCTCACGATGTTCGACAGCGACGTGGGGCACTACGTGGGGTTCACCCCCTTAGGGGAGAAATGGGCCCGGGACTGGAACAGCAACCCAGATCTCATGGAGACACAGCAAACTGCGGTGGACATAGTTTGCCGGCCCAACTACGAGATTTCTGTCCCATTCATTGTGGACCGCAGAG	CCAGTTTATGGGTAAGTTCGAGTGTCACTTCATTAACGGCACGGAGAAGGTGAGGTTCGTGCACAGGTACATCTATAACCGGGAGCAGCTCACGATGTTCGACAGCGACGTGGGGCACTACGTGGGGTTCACCCCCTTAGGGGAGAAATGGGCCCGGGACTGGAACAGCAACCCAGATCTCATGGAGACACAGCAAACTGCGGTGGACATAGTTTGCCGGCCCAACTACGAGATTTCTGTCCCATTCATTGTGGAC	Acar-DAB*29	OP524040
M-52	GGGTGTTCCACTACATGGCTACACACGAGTGTTACTACAATAACGGCACGGAGAAGGTGAGGTACATCCACAGGCACATCTACAACCGTGTGGAGTGGGCGATGCTCGACAGCGACGTGGGGCACTACGTGGGGTTCACCCCCTTTGGGGAGAAACAGGCCCAGGACTGGAACAGTGACCCAGATATCCTGGAGAACAAGCGAACTGCGGTGGACTGGCTCTGCCGGCACAACTACAAGGTCGATGCCCCGTTCACCGTGCCTCGCAGAG	CCACTACATGGCTACACACGAGTGTTACTACAATAACGGCACGGAGAAGGTGAGGTACATCCACAGGCACATCTACAACCGTGTGGAGTGGGCGATGCTCGACAGCGACGTGGGGCACTACGTGGGGTTCACCCCCTTTGGGGAGAAACAGGCCCAGGACTGGAACAGTGACCCAGATATCCTGGAGAACAAGCGAACTGCGGTGGACTGGCTCTGCCGGCACAACTACAAGGTCGATGCCCCGTTCACCGTGCCT	Acar-DAB*30	OP524041
P-53	GGGTGTTCCAGAGGATGCATAAGGCCGAGTGTCACTTCATTAACGGCACGGAGAAGGTGAGGTTGGTGGAGAGGCAAATCTACAACCGGGAACAGTACTTGATGTTCGACAGTGATGTGGGGCACTACGTGGGGTTCAACCGCTATGGGGAGTTCCAGGCCCAGTACAGGAACAGCAACCCAGATATCATGGAGAACAGACGGACTGCGGTGGACAGGTACTGCCGGAACAACTACGACGTTTTTGCCCCGTTCAGCGTGCAGCGCCGAG	CCAGAGGATGCATAAGGCCGAGTGTCACTTCATTAACGGCACGGAGAAGGTGAGGTTGGTGGAGAGGCAAATCTACAACCGGGAACAGTACTTGATGTTCGACAGTGATGTGGGGCACTACGTGGGGTTCAACCGCTATGGGGAGTTCCAGGCCCAGTACAGGAACAGCAACCCAGATATCATGGAGAACAGACGGACTGCGGTGGACAGGTACTGCCGGAACAACTACGACGTTTTTGCCCCGTTCAGCGTGCAG	Acar-DAB*31	OP524042
P-55	GGGTGTTCCAGGAGATGGGAAAGGTCGAGTGTCACTTCATTAACGGCACGGAGAAGGTGAGGTACGTGGAGAGGCACATCTACAACCGGGAGCAGATCCTGATGTTCGACAGCGACGTGGGGCACTACGTGGGGTTCACCCCCTATGGGGAGAAACAGGCCCGCGATGCGAACAACAACCGGGAATGGATGGAGTACACACGGACTGCGGTGGACAGGCTCTGCCGGCACAACTACCCGATTTTTGCCCCGTTCACCGTGCAGCGCCGAG	CCAGGAGATGGGAAAGGTCGAGTGTCACTTCATTAACGGCACGGAGAAGGTGAGGTACGTGGAGAGGCACATCTACAACCGGGAGCAGATCCTGATGTTCGACAGCGACGTGGGGCACTACGTGGGGTTCACCCCCTATGGGGAGAAACAGGCCCGCGATGCGAACAACAACCGGGAATGGATGGAGTACACACGGACTGCGGTGGACAGGCTCTGCCGGCACAACTACCCGATTTTTGCCCCGTTCACCGTGCAG	Acar-DAB*32	OP524043
U-56	GGGTGTTCCAGGAGATGGCTAAGCACGAGTGTCACTTCCTTAACGGCACGGAGAAGGTGAGGTACTTTCAGAGGCACATCTACAACCGTGTGGAGTACGCGATGTTCGACAGCGACGTGGGGCAGTACGTGGGGTTCACCCCCTTTGGGGAACAATGTGCCCAGTACTGGAACAGTAACCCAGATATCATGGAGGGGAAACCGGCTGAGGTGGACATCTGTCTGCAGAACTACGAGATTTTTGCCCCGTTCACCGTGGAGCGCAGAG	CCAGGAGATGGCTAAGCACGAGTGTCACTTCCTTAACGGCACGGAGAAGGTGAGGTACTTTCAGAGGCACATCTACAACCGTGTGGAGTACGCGATGTTCGACAGCGACGTGGGGCAGTACGTGGGGTTCACCCCCTTTGGGGAACAATGTGCCCAGTACTGGAACAGTAACCCAGATATCATGGAGGGGAAACCGGCTGAGGTGGACATCTGTCTGCAGAACTACGAGATTTTTGCCCCGTTCACCGTGGAG	Acar-DAB*33	OP524044
M-58	GGGTGTTCCACTACATGACAACGTCAGAGTGTTACTTCATTAACAGCACGGAGAAAGTGAGGTACATTGAGAGGGCCATCTACAACCGGGAGCAGGACCTGATGTTCGACAGCGATGTGGGGCACTTCGAGGGGTTCACCACCTTTGGGGAGAAACAGGCCCAGTACTGGAACAGCCTCCCAGATATCATGGAGAGGAGGCGGACTGCGGTGGACTGGTACTGCCGGCACAACTACGAGATTTATGGCCCGTTCAGTGTGGAGCGCCGAG	CCACTACATGACAACGTCAGAGTGTTACTTCATTAACAGCACGGAGAAAGTGAGGTACATTGAGAGGGCCATCTACAACCGGGAGCAGGACCTGATGTTCGACAGCGATGTGGGGCACTTCGAGGGGTTCACCACCTTTGGGGAGAAACAGGCCCAGTACTGGAACAGCCTCCCAGATATCATGGAGAGGAGGCGGACTGCGGTGGACTGGTACTGCCGGCACAACTACGAGATTTATGGCCCGTTCAGTGTGGAG	Acar-DAB*34	OP524045
P-59	GGGTGTTCCAATGGATGGGAAGGTTCAAGTGTTACTACATTAATGGCACAGAGAAGGTGAGGTACGTGGCGAGAGGCATCTACAACCGGGAGGAGTACGCGATGTTCGACAGCGACGTGGGGCACTTCGTGGGGTTCAACCCCTATGGGGAGAAACAGGCCCAGTCCAAGAACAGCGACTCAGAACAGATGGAGATTTATCGGACTGCGGTGGACACGTACTGCCGGCACAACTACAGATTGGCCGCCCCGTACCTCCCGGGGCGCCGAG	CCAATGGATGGGAAGGTTCAAGTGTTACTACATTAATGGCACAGAGAAGGTGAGGTACGTGGCGAGAGGCATCTACAACCGGGAGGAGTACGCGATGTTCGACAGCGACGTGGGGCACTTCGTGGGGTTCAACCCCTATGGGGAGAAACAGGCCCAGTCCAAGAACAGCGACTCAGAACAGATGGAGATTTATCGGACTGCGGTGGACACGTACTGCCGGCACAACTACAGATTGGCCGCCCCGTACCTCCCGGGG	Acar-DAB*35	OP524046
U-61	GGGTGTTTCAGAATTTGCAAAAGTTCGAGTGTCACTTCATTAACGGCACGGAGAAGGTGAGGTTCGTGCACAGGTTCATCTACAACCGGCTGCAGCAGGTGATATTTGACAGCGACGTGGGGCACTACGTGGGGTTTACCCCCTATGGGGAGAAACAGGCCCAGTGCTGGAACAGCAACCCAGATATCCTGGAGAACAAGCGGACTGCGGTAGACTGGTACTGCCGGCACAACTACGAGCTTGATGCCCCGTTCAGTGTGCACCGCCGAG	TCAGAATTTGCAAAAGTTCGAGTGTCACTTCATTAACGGCACGGAGAAGGTGAGGTTCGTGCACAGGTTCATCTACAACCGGCTGCAGCAGGTGATATTTGACAGCGACGTGGGGCACTACGTGGGGTTTACCCCCTATGGGGAGAAACAGGCCCAGTGCTGGAACAGCAACCCAGATATCCTGGAGAACAAGCGGACTGCGGTAGACTGGTACTGCCGGCACAACTACGAGCTTGATGCCCCGTTCAGTGTGCAC	Acar-DAB*36	OP524047
M-64	GGGTGTTCCAGGAGATGAGAAAGGCCGAGTGTCACTTCATTAACGGCACGGAGAAGGTGAGGTTCGTGGAGAGGTACATCTACAACCGTGTGGAGTACGTGATGTTCGACAGCGACGTGGGGCTCTACGTGGGGTTCACCCCCTTTGGGGAGAAACAGGCCCAGGACTGGAACAGCGACCCAGAATGGATGGAGAACAGACGGACGGTGGTGGACTGGGCCTGCCGGCACAACTACGAGATTTCTGTCCCGTTCATCGTGGATCGCCGAG	CCAGGAGATGAGAAAGGCCGAGTGTCACTTCATTAACGGCACGGAGAAGGTGAGGTTCGTGGAGAGGTACATCTACAACCGTGTGGAGTACGTGATGTTCGACAGCGACGTGGGGCTCTACGTGGGGTTCACCCCCTTTGGGGAGAAACAGGCCCAGGACTGGAACAGCGACCCAGAATGGATGGAGAACAGACGGACGGTGGTGGACTGGGCCTGCCGGCACAACTACGAGATTTCTGTCCCGTTCATCGTGGAT	Acar-DAB*37	OP524048
U-2 (PP1)	GGGTGTTCCAATGGATGGGAAGGTTCGAGTGTTACTACATTAATGGCACAGAGAAGGTGAGGTACGTGGCGAGAGGCATCTACAACCGGGAGGAGTACGCGATGTTCGACAGCGACGTGGGGCACTTCGTGGGGTTCAACCCCTATGGGGAGAAACAGGCCCAGTCCAAGAACAGCGACTCAGAACAGATGGAGATTTATCGGACTGCGGTGGACACGTACTGCCGGCACAACTACAGATTGGCCGCCCCGTACCTCCCGGGGCGCCGAG	NA	Acar-DAB*38	OP524049
M-67	GGGTGTTCCAGGAGATGCATAAGGCCGAGTGTCACTTCATTAACGGCACGGAGAAGGTGAGGTTCGTGGAGAGGTACATCTACAACCGTGTGGAGTTCGTGATGTATGACAGCGACGTGGGGCACTACGTGGGGTTCACCCCCTATGGGGAGAAAAATGCCCAGTACTGGAACAGCGACCCAGAAGGGATGGAGTACACACGGGGTCAAGTGGACAATTACTGCCGGCACAACTACAAGATTTCTGTCCCATTCATCGTGGATCGCCGAG	CCAGGAGATGCATAAGGCCGAGTGTCACTTCATTAACGGCACGGAGAAGGTGAGGTTCGTGGAGAGGTACATCTACAACCGTGTGGAGTTCGTGATGTATGACAGCGACGTGGGGCACTACGTGGGGTTCACCCCCTATGGGGAGAAAAATGCCCAGTACTGGAACAGCGACCCAGAAGGGATGGAGTACACACGGGGTCAAGTGGACAATTACTGCCGGCACAACTACAAGATTTCTGTCCCATTCATCGTGGAT	Acar-DAB*39	OP524050
U-71	GGGTGTTCCAGTTTATGGTTAAGAATGAGTGTTACTTCATTAACGGCACGGAGAAGGTGAGGTACGTTCAGACGGGCATCTACAACCGCGAGCAGCAGGCGATGTTCGACAGCGACGTGGGGCACTATGTGGGGTTCACCCCCTTAGGGGAGAAACACGCCCAGAACTTCAACAGCAACCTGGAAATACTGGAGCAAAAACGAACTGCTTTGGACTGGTTCTGCCGGCACAACTACGAGATTTCTCTTCCGTTCCTCGTGGATCGACGAG	CCAGTTTATGGTTAAGAATGAGTGTTACTTCATTAACGGCACGGAGAAGGTGAGGTACGTTCAGACGGGCATCTACAACCGCGAGCAGCAGGCGATGTTCGACAGCGACGTGGGGCACTATGTGGGGTTCACCCCCTTAGGGGAGAAACACGCCCAGAACTTCAACAGCAACCTGGAAATACTGGAGCAAAAACGAACTGCTTTGGACTGGTTCTGCCGGCACAACTACGAGATTTCTCTTCCGTTCCTCGTGGAT	Acar-DAB*40	OP524051
M-74	GGGTGTTCCAGCACAGGTTTGTGTCAGAATGTCACTTCATTAACGGCACGGAGAAGGTGAGGTTCGTGGAGAGGTACATCTACAACCGTGTGGAGTGGGCGATGTTTGACAGCGACGTGGGGCACTACGTGGGGTTCACCCCCTATGGGGAGAAACAGGCCCGCGATGCGAACAACAACCCGGAATGGATGGAATACACACGGACTGCGGTGGATTGGCTGTGCCTGGACTGGTTCAATCCTGATGACCCGTTCAGTGGGGGGCGCCGAG	CCAGCACAGGTTTGTGTCAGAATGTCACTTCATTAACGGCACGGAGAAGGTGAGGTTCGTGGAGAGGTACATCTACAACCGTGTGGAGTGGGCGATGTTTGACAGCGACGTGGGGCACTACGTGGGGTTCACCCCCTATGGGGAGAAACAGGCCCGCGATGCGAACAACAACCCGGAATGGATGGAATACACACGGACTGCGGTGGATTGGCTGTGCCTGGACTGGTTCAATCCTGATGACCCGTTCAGTGGGGGG	Acar-DAB*41	OP524052
M-79	GGGTGTTCCAGTTGATGCCTAAGGCCGAGTGTCACTTCATTAACGGCACGGAGAAGGTGAGGTACGTGGAGAGGCAAATCTACAACCGGGAGCAGATCCTGATGTTCGACAGCGACGTGGGGCACTACGTGGGGTTCACCCCCTTTGGGGAGAAACAGGCCCAGGACTGGAACAGCAAACCGGAATGGATGGAGAACAGACGGACTGCGGTGGACAGGTACTGCCGGCACAACTACCCGATTGCTGCCCCGTTCACCGTGCAGCGCCGAG	CCAGTTGATGCCTAAGGCCGAGTGTCACTTCATTAACGGCACGGAGAAGGTGAGGTACGTGGAGAGGCAAATCTACAACCGGGAGCAGATCCTGATGTTCGACAGCGACGTGGGGCACTACGTGGGGTTCACCCCCTTTGGGGAGAAACAGGCCCAGGACTGGAACAGCAAACCGGAATGGATGGAGAACAGACGGACTGCGGTGGACAGGTACTGCCGGCACAACTACCCGATTGCTGCCCCGTTCACCGTGCAG	Acar-DAB*42	OP524053
M-84	GGGTGTTCCAAAGGATGTCTAAGCACGAGTGTCACTTCATTAACGGCACGGAGAAGGTGAGGTTCGTGGAGAGGCTCATCTACAATCGAGAGCAGCTCCTGATGTTCGACAGCGACGTGGGGCACTACGTGGGGTTCACCCCCTATGGAGAGAAACTGGCCCAGTGCTGGAACAGCGTCCCAATTTATATGGAGGGAAAGCAGACTGCGGTGGACACGTTCTGCCGGCACAACTACGAGATTTCTGTCCCGTTCATCGTGGATCGCCGAG	CCAAAGGATGTCTAAGCACGAGTGTCACTTCATTAACGGCACGGAGAAGGTGAGGTTCGTGGAGAGGCTCATCTACAATCGAGAGCAGCTCCTGATGTTCGACAGCGACGTGGGGCACTACGTGGGGTTCACCCCCTATGGAGAGAAACTGGCCCAGTGCTGGAACAGCGTCCCAATTTATATGGAGGGAAAGCAGACTGCGGTGGACACGTTCTGCCGGCACAACTACGAGATTTCTGTCCCGTTCATCGTGGAT	Acar-DAB*43	OP524054
M-85	GGGTGTTCCACTACATGGCTACACACGAGTGTTACTACAATAACGGCACGGAGAAGGTGAGGTACATCCACAGGCACATCTACAACCGTGTGGAGTGGGCGCTGTTTGACAGCGAAGTGGGGCACTACGTGGGGTTCACCCCCTTTGGGGAGAAACAGGCCCAGGACTGGAACAGTGACCCAGATATCCTGGAGAACAAGCGAACTGCGGTGGACTGGCTCTGTCGGCACAACTACAAGGTCGATGCCCCGTTCACCGTGCCTCGCAGAG	CCACTACATGGCTACACACGAGTGTTACTACAATAACGGCACGGAGAAGGTGAGGTACATCCACAGGCACATCTACAACCGTGTGGAGTGGGCGCTGTTTGACAGCGAAGTGGGGCACTACGTGGGGTTCACCCCCTTTGGGGAGAAACAGGCCCAGGACTGGAACAGTGACCCAGATATCCTGGAGAACAAGCGAACTGCGGTGGACTGGCTCTGTCGGCACAACTACAAGGTCGATGCCCCGTTCACCGTGCCT	Acar-DAB*44	OP524055
M-86	GGGTGTTCCACTACATGGCTACACACGAGTGTTACTACAATAACGGCACGGAGAAGGTGAGGTACATCCACAGGCACATCTACAACCGTGTGGAGTGGGCGCTGTTTGACAGCGAAGTGGGGCACTACGTGGGGTTCACCCCCTTTGGGGAGAAACAGGCCCAGGACTGGAACAGTGACCCAGATATCCTGGAGAACAAGTGAACTGCGGTGGACTGGCTCTGCCGGCACAACTACAAGGTCGATGCCCCGTTCACCGTGCCTCGCAGAG	CCACTACATGGCTACACACGAGTGTTACTACAATAACGGCACGGAGAAGGTGAGGTACATCCACAGGCACATCTACAACCGTGTGGAGTGGGCGCTGTTTGACAGCGAAGTGGGGCACTACGTGGGGTTCACCCCCTTTGGGGAGAAACAGGCCCAGGACTGGAACAGTGACCCAGATATCCTGGAGAACAAGTGAACTGCGGTGGACTGGCTCTGCCGGCACAACTACAAGGTCGATGCCCCGTTCACCGTGCCT	Acar-DAB*45	OP524101
P-88	GGGTGTTCCAGTTTTTTGGAACGTCCGAGTGTCACTTCATTAATGGAACGGAGAAGGTGAGGTACCTGGACAGGTACATCTACAACCGTGTGGAGTGGGCGATGTTCGACAGCGACGTGGGGCACTTCGTGGGGTTCACCCCCTTTGGGGAGAAACAGGCCCAGTGCTGGAACAGCGACCCAGATATCCTGGAGAACAGACGGGCTCAAGTGGACACGTACTGCCGGCACAATTACAGATTGGCCGCCCCGTACCTCCCGGTGCGCCGAG	CCAGTTTTTTGGAACGTCCGAGTGTCACTTCATTAATGGAACGGAGAAGGTGAGGTACCTGGACAGGTACATCTACAACCGTGTGGAGTGGGCGATGTTCGACAGCGACGTGGGGCACTTCGTGGGGTTCACCCCCTTTGGGGAGAAACAGGCCCAGTGCTGGAACAGCGACCCAGATATCCTGGAGAACAGACGGGCTCAAGTGGACACGTACTGCCGGCACAATTACAGATTGGCCGCCCCGTACCTCCCGGTG	Acar-DAB*46	OP524056
M-89	GGGTGTTCCAGAAGTTTAGTACATCCGAGTGTCACTTCATTAACGGCACGGAGAAGGTGAGGTACATAGAGAGGAACATCTACAACCGTGTCGAGGACATGATGTTCGACAGCGACGTGGGGCACTTCGTGGGGTTCACCCCCTATGGGGAGAAACAGGCCCGGAACTGGAACAGCAACCCAAAATGGATGGAGGACATAAGGGCTGCTGTGTACACGTACTGCCGGCACAACTACCCGATTGTTGCCCCGTTCAGCGTGCAGCGCCGAG	CCAGAAGTTTAGTACATCCGAGTGTCACTTCATTAACGGCACGGAGAAGGTGAGGTACATAGAGAGGAACATCTACAACCGTGTCGAGGACATGATGTTCGACAGCGACGTGGGGCACTTCGTGGGGTTCACCCCCTATGGGGAGAAACAGGCCCGGAACTGGAACAGCAACCCAAAATGGATGGAGGACATAAGGGCTGCTGTGTACACGTACTGCCGGCACAACTACCCGATTGTTGCCCCGTTCAGCGTGCAG	Acar-DAB*47	OP524057
U-91	GGGTGTTCCACTACATGACAACGTCAGAGTGTTACTTCATTAACGGCACGGAGAAAGTGAGGTACATTGAGAGGGCCATCTACAACCGGGAGCAGGACCTGATGTTCGACAGCGATGTGGGGCACTTCGAGGGGTTCACCACCTTTGGGGAGAAACAGGCCCAGTACTGGAACAGCCTCCCAGATATCATGGAGAGGAGGCGGAATGCGGTGGACTGGTACTGCCGGCACAACTACGAGATTTATGGCCCGTTCAGTGTGGAGCGCCGAG	CCACTACATGACAACGTCAGAGTGTTACTTCATTAACGGCACGGAGAAAGTGAGGTACATTGAGAGGGCCATCTACAACCGGGAGCAGGACCTGATGTTCGACAGCGATGTGGGGCACTTCGAGGGGTTCACCACCTTTGGGGAGAAACAGGCCCAGTACTGGAACAGCCTCCCAGATATCATGGAGAGGAGGCGGAATGCGGTGGACTGGTACTGCCGGCACAACTACGAGATTTATGGCCCGTTCAGTGTGGAG	Acar-DAB*48	OP524058
M-93	GGGTGTTCCAGAGGATGTTTAAGGCCGAGTGTCACTTCATTAACGGCACGGAGAAGGTGAGGTTCGTGGAGAGGCAAATCTACAACCGGGAGCAGATCCTGATGTTCGACAGCGACGTGGGGCACTACGTGGGGTTCACCCCCTATGGGGAGAAACAGGCCCAGTACTGGAACAGCAACCCAGAACGGATGGAGTACCAGCAAACTGCGGTGGACAGGCTCTGCCGGCACAACTACGAGCTTGATGCCCCGTTCACCGTGCAGCGCCGAG	CCAGAGGATGTTTAAGGCCGAGTGTCACTTCATTAACGGCACGGAGAAGGTGAGGTTCGTGGAGAGGCAAATCTACAACCGGGAGCAGATCCTGATGTTCGACAGCGACGTGGGGCACTACGTGGGGTTCACCCCCTATGGGGAGAAACAGGCCCAGTACTGGAACAGCAACCCAGAACGGATGGAGTACCAGCAAACTGCGGTGGACAGGCTCTGCCGGCACAACTACGAGCTTGATGCCCCGTTCACCGTGCAG	Acar-DAB*49	OP524059
M-97	GGGTGTTTCAGAATTTGCAAAAGTTCGAGTGTCACTTCATTAACGGCACGGAGAAGGTGAGGTACATCCACAGGTTCATCTACAACCAGCTGCAGCAGGTGATATTTGACAGCGACGTGGGGCACTACGTGGGGTTCACCCCCTATGGAGAGAAACAGGCCCAGTGCTGGAACAGCAACCCAGATATCCTGGAGAACAAGCGGACTGCGGTAGACTGGTACTGCCGGCACAACTACGAGCTTGATGCCCCGTTCAGTGTGCACCGCCGAG	TCAGAATTTGCAAAAGTTCGAGTGTCACTTCATTAACGGCACGGAGAAGGTGAGGTACATCCACAGGTTCATCTACAACCAGCTGCAGCAGGTGATATTTGACAGCGACGTGGGGCACTACGTGGGGTTCACCCCCTATGGAGAGAAACAGGCCCAGTGCTGGAACAGCAACCCAGATATCCTGGAGAACAAGCGGACTGCGGTAGACTGGTACTGCCGGCACAACTACGAGCTTGATGCCCCGTTCAGTGTGCAC	Acar-DAB*50	OP524060
M-100	GGGTGTTCCAGCACATGTTTGTGTCAGAGTGTCACTTCATTAACGGCACGGAGAAGGTGAGGTTGGTGGAGAGGTACATCTACAACCGTGTGCAGTGGGCGTTATTTGACAGCAACGTGGGGCACTACGTGGGGTTCACCCCCTTTGGGGAGAAAAATGCCCAGGACTGGAACAGCAACCGAGTTATCCTGGAGAACAAGCGAACTGAGGTGGACTGGCTCTGCCGGCACAACTACCCGATTGTTGCCCCGTTCACTGTGCAGCGCCGAG	CCAGCACATGTTTGTGTCAGAGTGTCACTTCATTAACGGCACGGAGAAGGTGAGGTTGGTGGAGAGGTACATCTACAACCGTGTGCAGTGGGCGTTATTTGACAGCAACGTGGGGCACTACGTGGGGTTCACCCCCTTTGGGGAGAAAAATGCCCAGGACTGGAACAGCAACCGAGTTATCCTGGAGAACAAGCGAACTGAGGTGGACTGGCTCTGCCGGCACAACTACCCGATTGTTGCCCCGTTCACTGTGCAG	Acar-DAB*51	OP524061
M-101	GGGTGTTCCACTACATGGCTACACACGAGTGTTACTACAATAATGGCACGGAGAAGGTGAGGTACATCCACAGGCACATCTACAACCGTGTGGAGTGGGCGATGCTCGACAGCGACGTGGGGCACTACGTGGGGTTCACCCCCTTTGGGGAGAAACAGGCCCAGGACTGGAACAGTGACCCAGATATCCTGGAGAACAAGCGAACTGCGGTGGACTGGCTCTGCCGGCACAACTGCAAGGTCGATGCCCCGTTCACCGTGCCTCGCAGAG	CCACTACATGGCTACACACGAGTGTTACTACAATAATGGCACGGAGAAGGTGAGGTACATCCACAGGCACATCTACAACCGTGTGGAGTGGGCGATGCTCGACAGCGACGTGGGGCACTACGTGGGGTTCACCCCCTTTGGGGAGAAACAGGCCCAGGACTGGAACAGTGACCCAGATATCCTGGAGAACAAGCGAACTGCGGTGGACTGGCTCTGCCGGCACAACTGCAAGGTCGATGCCCCGTTCACCGTGCCT	Acar-DAB*52	OP524062
U-102	GGGTGTTTCAGAATTTGCAAAAGTTCCAGTGTCACTTCATTAACGGCACGGAGAAGGTGAGGTTCGTGCACAGGTTCATCTACAACCCCCTGCAGCAGGTGATATTTGACAGCGACGTGGGGCACTACGTGGGGTTTACCCCCTATGGGGAGAAACAGGCCCAGTGCTGGAACAGCAACCCAGATATCCTGGAGAACAAGTGGACTGCGGTAGACTGGTACTGCCGGCACAACTACGAGCTTGATGCCCCGTTCAGTGTGCACCGCCGAG	TCAGAATTTGCAAAAGTTCCAGTGTCACTTCATTAACGGCACGGAGAAGGTGAGGTTCGTGCACAGGTTCATCTACAACCCCCTGCAGCAGGTGATATTTGACAGCGACGTGGGGCACTACGTGGGGTTTACCCCCTATGGGGAGAAACAGGCCCAGTGCTGGAACAGCAACCCAGATATCCTGGAGAACAAGTGGACTGCGGTAGACTGGTACTGCCGGCACAACTACGAGCTTGATGCCCCGTTCAGTGTGCAC	Acar-DAB*53	OP524063
P-104	GGGTGTTCCACTACATGGCTACACACGAGTGTTACTACAATAACGGCACGGAGAAGGTGAGGTACATCCACAGGCACATCTACAACCGTGTGGAGTGGGCGCTGTTTGACAGCGAAGTTGGGCACTACGTGGGGTTCACCCCCTTTGGGGAGAAACAGGCCCAGGACTGGAACAGTGACCCAGATATCCTGGAGAACAAGTGAACTGCGGTGGACTGGCTCTGCCGGCACAACTACAAGGTCGATGCCCCGTTCACCGTGCCTCGCAGAG	CCACTACATGGCTACACACGAGTGTTACTACAATAACGGCACGGAGAAGGTGAGGTACATCCACAGGCACATCTACAACCGTGTGGAGTGGGCGCTGTTTGACAGCGAAGTTGGGCACTACGTGGGGTTCACCCCCTTTGGGGAGAAACAGGCCCAGGACTGGAACAGTGACCCAGATATCCTGGAGAACAAGTGAACTGCGGTGGACTGGCTCTGCCGGCACAACTACAAGGTCGATGCCCCGTTCACCGTGCCT	Acar-DAB*54	OP524102
M-5 (PP1)	GGGTGTTCCACTACATGGCTACACACGAGTGTTACTACAATAACGGCACGGAGAAGGTGAGGTACATCCACAGGCACATCTACAACCGTGTGGAGTGGGCGCTGTTTGACAGCGAAGTGGGGCACTACGTGGGGTTCACCCCCTTTGGGGAGAAACAGGCCCAGGACTGGAACAGTGACCCAGATATCCTGGAGAACAAGCGAACTGCGGTGGACTGGCTCTGCCGGCACAACTACAAGGTCGATGCCCTGTTCACCGTGCCTCGCAGAG	NA	Acar-DAB*55	OP524064
M-107	GGGTGTTCCAGTTTATGTTTAAGTTCGAGTGTCACTTCATTAACGGCACGGAGAAGGTGAGGTTCGTGCAGAGGAACATCTACAACCGTGTGGAGTTTGTGATGTTCGACAGCGACGTGGGGCACTACGTGGGGTTCACCCCCTATGGGGAGAAATGGGCCCAGGACTGGAACAGCAACCCGGAATGGATGGAGAACAGACGGACGGTGGTGGACTGGTTCTGCCGGTACAACTACCCGATTTTTGCCCCGTTCAGCGTGCAGCGCCGAG	CCAGTTTATGTTTAAGTTCGAGTGTCACTTCATTAACGGCACGGAGAAGGTGAGGTTCGTGCAGAGGAACATCTACAACCGTGTGGAGTTTGTGATGTTCGACAGCGACGTGGGGCACTACGTGGGGTTCACCCCCTATGGGGAGAAATGGGCCCAGGACTGGAACAGCAACCCGGAATGGATGGAGAACAGACGGACGGTGGTGGACTGGTTCTGCCGGTACAACTACCCGATTTTTGCCCCGTTCAGCGTGCAG	Acar-DAB*56	OP524065
P-109	GGGTGTTCCACTACATGGCTACACACGAGTGTTACTACAATAACGGCACGGAGAAGGTGAGGTACATCCACAGGCACATCTACAACCGTGTGGAGTGGGCGATGTTTGACAGCGAAGTGGGGCACTAAGTGGGGTTCACCCCCTTTGGGGAGAAACAGGCCCAGGACTGGAACAGTGACCCAGATATCCTGGAGAACAAGCGAACTGCGGTGGACTGGCTCTGCCGGCACAACTACAAGGTCGATGCCCCGTTCACCGTGCCTCGCAGAG	CCACTACATGGCTACACACGAGTGTTACTACAATAACGGCACGGAGAAGGTGAGGTACATCCACAGGCACATCTACAACCGTGTGGAGTGGGCGATGTTTGACAGCGAAGTGGGGCACTAAGTGGGGTTCACCCCCTTTGGGGAGAAACAGGCCCAGGACTGGAACAGTGACCCAGATATCCTGGAGAACAAGCGAACTGCGGTGGACTGGCTCTGCCGGCACAACTACAAGGTCGATGCCCCGTTCACCGTGCCT	Acar-DAB*57	OP524103
M-110	GGGTGTTCCACTACATGACAACGTCAGAGTGTTACTTCATTAACGGCACGGAGAAAGTGAGGTACATTGAGAGGGCCATGTACAACCGGGAGCAGGACCTGATGTTCGACAGCGATGTGGGGCACTTCGTGGGGTTCACCCCCTTTGGGGAGAAACAGGCCCAGTACTGGAACAGCCTCCCAGATATCATGGAGAGGAGGCGGACTGCGGTGGACTGGTACTGCCGGTACAACTACGAGATTTATGGCCTGTTCAGCGTGGAGCGCCGAG	CCACTACATGACAACGTCAGAGTGTTACTTCATTAACGGCACGGAGAAAGTGAGGTACATTGAGAGGGCCATGTACAACCGGGAGCAGGACCTGATGTTCGACAGCGATGTGGGGCACTTCGTGGGGTTCACCCCCTTTGGGGAGAAACAGGCCCAGTACTGGAACAGCCTCCCAGATATCATGGAGAGGAGGCGGACTGCGGTGGACTGGTACTGCCGGTACAACTACGAGATTTATGGCCTGTTCAGCGTGGAG	Acar-DAB*58	OP524066
M-111	GGGTGTTCCAGTTTATGGGTAAGTTCGAGTGTCACTTCATTAACGGCACGGAGAAGGTGAGGTTCGTGCACAGGTACATCTATAACCGGGAGCAGCTCACGATGTTCGACAGCGACCTGGGGCACTTCGTGGGGTTCACCCCCTTAGGGGAGAAATGGGCCCGGGACTGGAACAGCAACCCAGATCTCATGGAGACACAGCAAACTGCGGTGGACATAGTTTGCCGGCCCAACTACGAGATTTCTGTCCCATTCATCGTGCAGCGCAGAG	CCAGTTTATGGGTAAGTTCGAGTGTCACTTCATTAACGGCACGGAGAAGGTGAGGTTCGTGCACAGGTACATCTATAACCGGGAGCAGCTCACGATGTTCGACAGCGACCTGGGGCACTTCGTGGGGTTCACCCCCTTAGGGGAGAAATGGGCCCGGGACTGGAACAGCAACCCAGATCTCATGGAGACACAGCAAACTGCGGTGGACATAGTTTGCCGGCCCAACTACGAGATTTCTGTCCCATTCATCGTGCAG	Acar-DAB*59	OP524067
P-112	GGGTGTTCCAATGGATGGGAAGGTTCGAGTGTTACTACATTAATGGCATAGAGAAGGTGAGGTACGTGGCGAGAGGCATCTACAACCGGGAGGAGTACGCGATGTTCGACAGCGACGTGGGGCACTTCGTGGGGTTCAACCCCTATGGGGAGAAACAGGCCCAGTCCAAGAACAGCGACTCAGAACAGATGGAGATTTATCGGACTGCGGTGGACACGTACTGCCGGCACAACTACAGATTGGCCGCCCCGTACCTCCCGGGGCGCCGAG	CCAATGGATGGGAAGGTTCGAGTGTTACTACATTAATGGCATAGAGAAGGTGAGGTACGTGGCGAGAGGCATCTACAACCGGGAGGAGTACGCGATGTTCGACAGCGACGTGGGGCACTTCGTGGGGTTCAACCCCTATGGGGAGAAACAGGCCCAGTCCAAGAACAGCGACTCAGAACAGATGGAGATTTATCGGACTGCGGTGGACACGTACTGCCGGCACAACTACAGATTGGCCGCCCCGTACCTCCCGGGG	Acar-DAB*60	OP524068
P-113	GGGTGTTCCACTACATGGCTACACACGAGTGTTACTACAATAATGGCACGGAGAAGGTGAGGTACATCCACAGGCACATCTACAACCGTGTGGAGTGGGCGATGTTTGACAGCGACGTGGGGCACTACGTGGGGTTCACCCCCTTTGGGGAGAAACAGGTCCGGTACTGGAACAGCGCCCCAGATATCCTGGAGAACAAGTGAACTGCGGTGGACTGGCTCTGCCGGCACAACTACAAGGTCGATGCCCCGTTCACCGTGCCTCGCAGAG	CCACTACATGGCTACACACGAGTGTTACTACAATAATGGCACGGAGAAGGTGAGGTACATCCACAGGCACATCTACAACCGTGTGGAGTGGGCGATGTTTGACAGCGACGTGGGGCACTACGTGGGGTTCACCCCCTTTGGGGAGAAACAGGTCCGGTACTGGAACAGCGCCCCAGATATCCTGGAGAACAAGTGAACTGCGGTGGACTGGCTCTGCCGGCACAACTACAAGGTCGATGCCCCGTTCACCGTGCCT	Acar-DAB*61	OP524104
P-115	AGGTGTTCCAGTTTATGGGAAAGGCCGAGTGTCACTTCATTAACGGCACGGAGAAGGTGAGGTTCGTGCAGAGGTACATCTACAACCGTGTGGAGTACGTGATGTTCGACAGTGATGTGGGGCACCACGTGGGGTTCACCCCCTATGGAGAGAAACTGGCCCGCGATGCGAACAACAACCCGGAATGGATGGAGTACACACGGACTGCGGTGGACAGGCTCTGCCGGAACAACTACAAGCTTGCTGTCCCGTTCAGCGTGCAGCGCCGAG	CCAGTTTATGGGAAAGGCCGAGTGTCACTTCATTAACGGCACGGAGAAGGTGAGGTTCGTGCAGAGGTACATCTACAACCGTGTGGAGTACGTGATGTTCGACAGTGATGTGGGGCACCACGTGGGGTTCACCCCCTATGGAGAGAAACTGGCCCGCGATGCGAACAACAACCCGGAATGGATGGAGTACACACGGACTGCGGTGGACAGGCTCTGCCGGAACAACTACAAGCTTGCTGTCCCGTTCAGCGTGCAG	Acar-DAB*62	OP524069
M-116	GGGTGTTCCAGCACGTGTTTAAGGGCGAGTGTCACTTCATTAACGGCACGGAGAAGGTGAGGTACGTGCAGAGGTTCATCTACAACCGTGTGATGTGGGCGATGTTCGACAGCGACGTGGGGCACTACGCGGGGTTCACCCCCTTAGGGGAGAAATGGGCCCAGTACTGGAACAGCAACCCAGATCTCATGGAGCGCATTCGGAGCGAGGTGGACAGCTTATGCAGGCGCAACCACCCGACTGCTGCCCCGTTCAGCGTGCAGCGCCGTG	CCAGCACGTGTTTAAGGGCGAGTGTCACTTCATTAACGGCACGGAGAAGGTGAGGTACGTGCAGAGGTTCATCTACAACCGTGTGATGTGGGCGATGTTCGACAGCGACGTGGGGCACTACGCGGGGTTCACCCCCTTAGGGGAGAAATGGGCCCAGTACTGGAACAGCAACCCAGATCTCATGGAGCGCATTCGGAGCGAGGTGGACAGCTTATGCAGGCGCAACCACCCGACTGCTGCCCCGTTCAGCGTGCAG	Acar-DAB*63	OP524070
U-117	GGGTGTTCCAATGGATGGGAAAGTTCGAGTGTTACTACATTAATGGCACAGAGAAGGTGAGGTACGTGTCGAGAGGCATCTACAACCGGGAGGAGTACGCGATGTTCGACAGCGACGTGGGGCACTACGTGGGGTTCAACCGCTATGGGGAGAAACAGGCCCAGTCCAAGAACAGCGACTCAGAACAGATGGAGATTTATCGGACTGCGGTGGACACGTACTGCCGGCACAACTACAGATTGGCCGCCCCGTACCTCCCGGGGCGCCGAG	CCAATGGATGGGAAAGTTCGAGTGTTACTACATTAATGGCACAGAGAAGGTGAGGTACGTGTCGAGAGGCATCTACAACCGGGAGGAGTACGCGATGTTCGACAGCGACGTGGGGCACTACGTGGGGTTCAACCGCTATGGGGAGAAACAGGCCCAGTCCAAGAACAGCGACTCAGAACAGATGGAGATTTATCGGACTGCGGTGGACACGTACTGCCGGCACAACTACAGATTGGCCGCCCCGTACCTCCCGGGG	Acar-DAB*64	OP524071
P-118	GGGTGTTCCAATGGATGGGAAAGTTCGAGTGTTACTACATTAATGGCACAGAGAAGGTGAGGTACGTGGCGAGAGGCATCTACAACCGGGAGGAGTACGCGATGTTCGACAGCGACGTGGGGCACTTCGTGGGGTTCAACCCCTATGGGGAGAAACAGGCCCAGTCCAAGAACAGCGACTCAGAACAGATGGAGATTTATCGGACTGCGGTGGACACGTACTGCCGGCACAACTACAGATTGGCCGCCCCGTACCTCCCGGGGCGCCGAG	CCAATGGATGGGAAAGTTCGAGTGTTACTACATTAATGGCACAGAGAAGGTGAGGTACGTGGCGAGAGGCATCTACAACCGGGAGGAGTACGCGATGTTCGACAGCGACGTGGGGCACTTCGTGGGGTTCAACCCCTATGGGGAGAAACAGGCCCAGTCCAAGAACAGCGACTCAGAACAGATGGAGATTTATCGGACTGCGGTGGACACGTACTGCCGGCACAACTACAGATTGGCCGCCCCGTACCTCCCGGGG	Acar-DAB*65	OP524072
U-120	GGGTGTTCCACTACATGGCTACACACGAGTGTTACTACAATAACGGCACGGAGAAGGTGAGGTACATCCACAGGCACATCTACAACCGTGTGGAGTGGGCGCTGTTTGACAGCGAAGTGGGGCACTACGTGGGGTTCACCCCCTTTGGGGAGAAACAGGCCCAGGACTGGAACAGTGACCCAGATATCCTGGAGAACAAGCGAACTGCGGTGGACTGGCTCTGCCGGCACAACTACAAGGTCGATGCCCCGTTCACCGTGCCTCGCAGAG	CCACTACATGGCTACACACGAGTGTTACTACAATAACGGCACGGAGAAGGTGAGGTACATCCACAGGCACATCTACAACCGTGTGGAGTGGGCGCTGTTTGACAGCGAAGTGGGGCACTACGTGGGGTTCACCCCCTTTGGGGAGAAACAGGCCCAGGACTGGAACAGTGACCCAGATATCCTGGAGAACAAGCGAACTGCGGTGGACTGGCTCTGCCGGCACAACTACAAGGTCGATGCCCCGTTCACCGTGCCT	Acar-DAB*66	OP524073
M-7 (PP1)	GGGTGTTCCAGCACATGTTTAAGGGCGAGTGTCACTTCATTAACGGCACGGAGAAGGTGAGGTACGTGCAGAGGTTCATCTACAACCGTGTGATGTGGGCGATGTTCGACAGCGACGTGGGGCACTACGTGGGGTTCACTCCCTTAGGGGAGAAATGGGCCCAGTACTGGAACAGCAACCCAGATCTCATGGAGCGCATTCGGAGCGAGGTGGACAGCTTATGCAGGCGACACCACCCGACTGCTGCCCCGTTCAGCGTGCAGCGCCGTG	NA	Acar-DAB*67	OP524074
M-121	GGGTGTTTCAGAATTTGCAAAAGTTCGAGTGTCACTTCATTAACGGCACGGAGAAGGTGAGGTTCGTGCACAGGTTCATCTACAACCCGCTGCAGCAGGTGATATTTGACAGCGACGTGGGGCACTACGTGGGGTTTACCCCCTATGGAGAGAAACAGGCCCAGTGCTGGAACAGCAACCCAGATATCCTGGAGAACACGCGGACTGCGGTAGACTGGTACTGCCGGCACAACTACGAGCTTGATGCCCCGTTCAGTGTGCACCGCCGAG	TCAGAATTTGCAAAAGTTCGAGTGTCACTTCATTAACGGCACGGAGAAGGTGAGGTTCGTGCACAGGTTCATCTACAACCCGCTGCAGCAGGTGATATTTGACAGCGACGTGGGGCACTACGTGGGGTTTACCCCCTATGGAGAGAAACAGGCCCAGTGCTGGAACAGCAACCCAGATATCCTGGAGAACACGCGGACTGCGGTAGACTGGTACTGCCGGCACAACTACGAGCTTGATGCCCCGTTCAGTGTGCAC	Acar-DAB*68	OP524075
U-122	GGGTGTTCCAGAGGATGTTTAAGGGCGAGTGTCACTTCATTAACGGCACGGAGAAGGTGAGGTTCGTGGAGAGGCAAATCTACAACCGGGAGCAGATCCTGATGTTCGACAGCGACGTGGGGCACTACGTGGGGTTCACCCCCTTTGGGGAGAAACAGGCCCAGTACAGGAACAGCGACCCAGAATGGATGGAGAACAGACGGACTGTGGTGGACTGGGCCTGCCGGCACAACTACCCGATTCTTGCCCCGTTCAGCGTGCAGCGCCGAG	CCAGAGGATGTTTAAGGGCGAGTGTCACTTCATTAACGGCACGGAGAAGGTGAGGTTCGTGGAGAGGCAAATCTACAACCGGGAGCAGATCCTGATGTTCGACAGCGACGTGGGGCACTACGTGGGGTTCACCCCCTTTGGGGAGAAACAGGCCCAGTACAGGAACAGCGACCCAGAATGGATGGAGAACAGACGGACTGTGGTGGACTGGGCCTGCCGGCACAACTACCCGATTCTTGCCCCGTTCAGCGTGCAG	Acar-DAB*69	OP524076
M-124	GGGTGTTCCAGGGGTTGAGTACATCCGAGTGTTATTTCATTAACGGCACGGAGAAGGTGAGGTTCGTGGAGAGGTTCATCTACAACCGGGAGGAGTATCTGAGGTTCGACAGCGACGTGGGGCACTACGTGGGTTTCACACCCTTAGGGGAGAGGAATGCCAACCTCTTTAACAGCAACCCAGATATCATGGAGGACAGGCGTACTGCGGTGGACTGGTTCTGCCGGCGCAGCTACGAGATTTCGCTCCCGTTCCTCGTGCAGCGCCGAG	CCAGGGGTTGAGTACATCCGAGTGTTATTTCATTAACGGCACGGAGAAGGTGAGGTTCGTGGAGAGGTTCATCTACAACCGGGAGGAGTATCTGAGGTTCGACAGCGACGTGGGGCACTACGTGGGTTTCACACCCTTAGGGGAGAGGAATGCCAACCTCTTTAACAGCAACCCAGATATCATGGAGGACAGGCGTACTGCGGTGGACTGGTTCTGCCGGCGCAGCTACGAGATTTCGCTCCCGTTCCTCGTGCAG	Acar-DAB*70	OP524077
P-125	GGGTGTTCCAGTTTATGGTTAAGAATGAGTGTTACTTCATTAACGGCACGGAGAAGGTGAGGTACGTTCAGACGGGCATCTACAACCGCGAGCAGCAGGCGATGTTCGACAGCGACTTGGGGCACTATGTGGGGTTCACCCCCTTAGGGGAGAAACACGCCCAGAACTTCAACAGCAACCTGGAAATACTGGAGCAAAAACGAACTGCTTTGGACTGGTTCTGCCGGCCCAGCTACGAGATTTCTCTTCCGTTCCTCGTGGATCGACGAG	CCAGTTTATGGTTAAGAATGAGTGTTACTTCATTAACGGCACGGAGAAGGTGAGGTACGTTCAGACGGGCATCTACAACCGCGAGCAGCAGGCGATGTTCGACAGCGACTTGGGGCACTATGTGGGGTTCACCCCCTTAGGGGAGAAACACGCCCAGAACTTCAACAGCAACCTGGAAATACTGGAGCAAAAACGAACTGCTTTGGACTGGTTCTGCCGGCCCAGCTACGAGATTTCTCTTCCGTTCCTCGTGGAT	Acar-DAB*71	OP524078
U-127	GGGTGTTCCAATGGATGGGAAGGTTCGAGTGTTACTACATTAATGGCACAGAGAAGGTGAGGTACGTGTCGAGAGGCATCTACAACCGGGAGGAGTACGCGATGTTCGACAGCGACGTGGGGCACTTCGTGGGGTTCAACCCCTATGGGGAGAAACAGGCCCAGTCCAAGAACAGCGACTCAGAACAGATGGAGATTTATCGGACTGCGGTGGACACGTACTGCCGGCACAACTACAGATTGGCCGCCCCGTACCTCCCGGGGCGCCGAG	CCAATGGATGGGAAGGTTCGAGTGTTACTACATTAATGGCACAGAGAAGGTGAGGTACGTGTCGAGAGGCATCTACAACCGGGAGGAGTACGCGATGTTCGACAGCGACGTGGGGCACTTCGTGGGGTTCAACCCCTATGGGGAGAAACAGGCCCAGTCCAAGAACAGCGACTCAGAACAGATGGAGATTTATCGGACTGCGGTGGACACGTACTGCCGGCACAACTACAGATTGGCCGCCCCGTACCTCCCGGGG	Acar-DAB*72	OP524079
P-129	GGGTGCTCCAATGGATGGGAAGGTTCGAGTGTTACTACATTAATGGCACAGAGAAGGTGAGGTACGTGGCTAGAGGCATCTACAACTGGGAGGAGTACGCGATGTTCGACAGCGACGTGGGGCACTTCGTGGGGTTCAACCCCTATGGGGAGAAACAGGCCCAGGACTGGAACAGCGACCCAGAACAGATGGAGATTTATCGGACTGCGGTGGACACGTACTGCCGGCACAACTACAGATTGGCCGCCCCGTACCTCCCGGGGCGCCGAG	CCAATGGATGGGAAGGTTCGAGTGTTACTACATTAATGGCACAGAGAAGGTGAGGTACGTGGCTAGAGGCATCTACAACTGGGAGGAGTACGCGATGTTCGACAGCGACGTGGGGCACTTCGTGGGGTTCAACCCCTATGGGGAGAAACAGGCCCAGGACTGGAACAGCGACCCAGAACAGATGGAGATTTATCGGACTGCGGTGGACACGTACTGCCGGCACAACTACAGATTGGCCGCCCCGTACCTCCCGGGG	Acar-DAB*73	OP524080
P-130	GGGTGTTCCAGAGGATGTTTAAGGCCGAGTGTCACTTCATTAACGGCACGGAGAAGGTGAGGTTCGTGGAGAGGCACATCTACAACCGGGAGCAGATCCTGATGTTCGACAGCGACGTGGGGCACTACGTGGGGTTCACCCCCTATGGGGAGAAACAGGCCCAGTGCTGGAACAGCAACCCAGAACGGATGGAGTACCAGCGAACTGCGGTGGACAGGCTCTGCCGGCACAACTACGAGCTTGATGCCCCGTTCACCGTGCAGCGCCGAG	CCAGAGGATGTTTAAGGCCGAGTGTCACTTCATTAACGGCACGGAGAAGGTGAGGTTCGTGGAGAGGCACATCTACAACCGGGAGCAGATCCTGATGTTCGACAGCGACGTGGGGCACTACGTGGGGTTCACCCCCTATGGGGAGAAACAGGCCCAGTGCTGGAACAGCAACCCAGAACGGATGGAGTACCAGCGAACTGCGGTGGACAGGCTCTGCCGGCACAACTACGAGCTTGATGCCCCGTTCACCGTGCAG	Acar-DAB*74	OP524081
P-131	GGGTGTTCCACTACATGGCTACACACGAGTGTTACTACAATAACGGCACGGAGAAGGTGAGGTACATCCACAGGCACATCTACAACCGTGTGGCGTGGGCGATGTTTGACAGCGAAGTGGGGCACTACGTGGGGTTCACCCCCTTTGGGGAGAAACAGGCCCAGGACTGGAACAGTGACCCAGATATCCTGGAGAACAAGCGAACTGCGGTGGACTGGCTCTGCCGGCACAACTACAAGGTCGATGCCCCGTTCACCGTGCCTCGCAGAG	CCACTACATGGCTACACACGAGTGTTACTACAATAACGGCACGGAGAAGGTGAGGTACATCCACAGGCACATCTACAACCGTGTGGCGTGGGCGATGTTTGACAGCGAAGTGGGGCACTACGTGGGGTTCACCCCCTTTGGGGAGAAACAGGCCCAGGACTGGAACAGTGACCCAGATATCCTGGAGAACAAGCGAACTGCGGTGGACTGGCTCTGCCGGCACAACTACAAGGTCGATGCCCCGTTCACCGTGCCT	Acar-DAB*75	OP524082
U-132	GGGTGTTCCAGCACGTGTTTAAGGGCGAGTGTCACTTCATTAACGGCACGGAGAAGGTGAGGTACGTGCAGAGGTTCATCTACAACCGTGTGATGTGGGCGATGTTCGACAGCGACGTGGGGCACTTCGTGGGGCTCACTCCCTTAGGGGAGAAATGAGCCCAGTACTGGAACAGCAACCCAGATCTCATGGAGCGCATTCGGAGCGAGGTGGACAGCTTATGCAGGCGCAACCACCCGACTGCTGCCCCGTTCAGCGTGCAGCGCCGTG	CCAGCACGTGTTTAAGGGCGAGTGTCACTTCATTAACGGCACGGAGAAGGTGAGGTACGTGCAGAGGTTCATCTACAACCGTGTGATGTGGGCGATGTTCGACAGCGACGTGGGGCACTTCGTGGGGCTCACTCCCTTAGGGGAGAAATGAGCCCAGTACTGGAACAGCAACCCAGATCTCATGGAGCGCATTCGGAGCGAGGTGGACAGCTTATGCAGGCGCAACCACCCGACTGCTGCCCCGTTCAGCGTGCAG	Acar-DAB*76	OP524105
P-134	GAGTGTTCCAGGAGTTTAGCACATCCGAGTGTCACTTCATTAACGGCACGGAGAAGGTGAGGTTCGTGGAGAGGTACATCTACAATCGTGTGGAGTACGCGATGTTCGACAGCAACGTGGGGCACTATGTGGGGTTCACCCCCTTTGGGGAGAAAAATGCCCAGTACTGGAACAGCAACCCGGAACTGATGGAGAACAGACGGGGTCAAGTGGACACAGTTTGCCGGCACAACTACCCGATTGTTGCCCCGTTCAGCGTGCAGCGCCGAG	CCAGGAGTTTAGCACATCCGAGTGTCACTTCATTAACGGCACGGAGAAGGTGAGGTTCGTGGAGAGGTACATCTACAATCGTGTGGAGTACGCGATGTTCGACAGCAACGTGGGGCACTATGTGGGGTTCACCCCCTTTGGGGAGAAAAATGCCCAGTACTGGAACAGCAACCCGGAACTGATGGAGAACAGACGGGGTCAAGTGGACACAGTTTGCCGGCACAACTACCCGATTGTTGCCCCGTTCAGCGTGCAG	Acar-DAB*77	OP524083
P-136	GGGTGTTCCAGGAGATGATGAAGGGAGAGTGTTACTTCCTTAACGGCACGGAGAAGGTGAGATTGGTGGTGAGGCAAATCTACAACCGAGAAGAGTACGCGGTGTTCGACAGCGACGTGGGACATTACGTGGGGTTCACCCCCTATGGGGAGAAACAGGCCCGGTACTGGAACAGCAACCCAGATTTCATGGAGCGCATGCGGACTCAGGTGGACACCTGCCGGCACAGCTACAGGGTTAATGCCCCGTTCAGCGTGCAGCGCCAAG	CCAGGAGATGATGAAGGGAGAGTGTTACTTCCTTAACGGCACGGAGAAGGTGAGATTGGTGGTGAGGCAAATCTACAACCGAGAAGAGTACGCGGTGTTCGACAGCGACGTGGGACATTACGTGGGGTTCACCCCCTATGGGGAGAAACAGGCCCGGTACTGGAACAGCAACCCAGATTTCATGGAGCGCATGCGGACTCAGGTGGACACCTGCCGGCACAGCTACAGGGTTAATGCCCCGTTCAGCGTGCAG	Acar-DAB*78	OP524084
P-137	GGGTGTTCCAGCACATGTTTGTGTCAGAGTGTCACTTCATTAACGGCACGGAGAAGGTGAGGTTGGTGGCGAGGAACTTCTACAACCGTGTGGAGCACGTGATGTATGACAGCGACGTGGGGCATCACGTGGGGTTCACCCCCTTTGGGGAGAAGGTGGCCAGGAAATGGAACAACGATCCAGATTTCATGGAGCTGAGAAGGGGTGAGGTGGACACAGTTTGCCGGCACAACTACGAGCTTTATGCCCCGTTCAGCGTGCAGCGCCGAG	CCAGCACATGTTTGTGTCAGAGTGTCACTTCATTAACGGCACGGAGAAGGTGAGGTTGGTGGCGAGGAACTTCTACAACCGTGTGGAGCACGTGATGTATGACAGCGACGTGGGGCATCACGTGGGGTTCACCCCCTTTGGGGAGAAGGTGGCCAGGAAATGGAACAACGATCCAGATTTCATGGAGCTGAGAAGGGGTGAGGTGGACACAGTTTGCCGGCACAACTACGAGCTTTATGCCCCGTTCAGCGTGCAG	Acar-DAB*79	OP524085
U-138	GGGTGTTCCAGTTTATGGATAAGCACGAGTGTCACTTCATTAACGGCACGGAGAAGGTGAGGTACATCCACAGGGACATCTTCAACCGAGAGCAGCTTTATCAGTTCGACAGCGACGTGGGGCACTACGTGGGGTTCACCTCCCATTGGGAGAACCAGTTCCGGGAATGGAAGTGCGACCCGGAAGGGATGGAGTACACACGGACTGCGGTAGACAGGTACTGCCGGCACAACTACAGATTGGCCGCCCCGTACCTCCCGATTCGCAGAG	CCAGTTTATGGATAAGCACGAGTGTCACTTCATTAACGGCACGGAGAAGGTGAGGTACATCCACAGGGACATCTTCAACCGAGAGCAGCTTTATCAGTTCGACAGCGACGTGGGGCACTACGTGGGGTTCACCTCCCATTGGGAGAACCAGTTCCGGGAATGGAAGTGCGACCCGGAAGGGATGGAGTACACACGGACTGCGGTAGACAGGTACTGCCGGCACAACTACAGATTGGCCGCCCCGTACCTCCCGATT	Acar-DAB*80	OP524086
M-140	GGGTGTTCCAGCACGTGTTTAAGGGCGAGTGTCACTTCATTAACGGCACGGAGAAGGTGAGGTACGTGCAGAGGTTCATCTACAACCGTGTGATGTGGGCGATGTTCGACAGCGATATGGGGCACTTCGTGGGGCTCACTCCCTTAGCGGAGAAATGGGCCCAGTACTGGAACAGCAACCCAGATCTCATGGAGCGCATTCGGAGCGAGGTGGACAGCTTATGCAGGCGCAACCACCCGACTGCTGCCCCGTTCAGCGTGCAGCGCCGTG	CCAGCACGTGTTTAAGGGCGAGTGTCACTTCATTAACGGCACGGAGAAGGTGAGGTACGTGCAGAGGTTCATCTACAACCGTGTGATGTGGGCGATGTTCGACAGCGATATGGGGCACTTCGTGGGGCTCACTCCCTTAGCGGAGAAATGGGCCCAGTACTGGAACAGCAACCCAGATCTCATGGAGCGCATTCGGAGCGAGGTGGACAGCTTATGCAGGCGCAACCACCCGACTGCTGCCCCGTTCAGCGTGCAG	Acar-DAB*81	OP524087
P-142	GGGTGTTCCACTACATGGCTACACACGAGTGTTACTACAATAACGGCACGGAGAAGGTGAGGTACATCCACAGGCACATCTACAACCGTGTGGAGTGGGCGATGTTTGACAGCGAAGTGGGGCACTACGTGGGGTTCACCCCCTTTGGGGAGAAACAGGCCCAGGACTGGAACAGTGACCCAGATATCCTGGAGAACAAGTGAACTGCGGTGGACTGGCTCTGCCGGCACAACTACAAGGTCGATGCCCCGTTCACCGTGCCTCGCAGAG	CCACTACATGGCTACACACGAGTGTTACTACAATAACGGCACGGAGAAGGTGAGGTACATCCACAGGCACATCTACAACCGTGTGGAGTGGGCGATGTTTGACAGCGAAGTGGGGCACTACGTGGGGTTCACCCCCTTTGGGGAGAAACAGGCCCAGGACTGGAACAGTGACCCAGATATCCTGGAGAACAAGTGAACTGCGGTGGACTGGCTCTGCCGGCACAACTACAAGGTCGATGCCCCGTTCACCGTGCCT	Acar-DAB*82	OP524106
M-143	CGGTGTTCCAGGAGATGATGACGGGAGAGTGTCACTTCCTTAACGGCACGGAGAAGGTGAGATTGGTGGTGAGGCAAATCTACAACCGAGAAGAGTACGCGGTGTTCGACAGCGACGTGGGACAGTACGTGGGGTTCACCCCCTATGGGGAGAAACAGGCCCGGTACTGGAACAGCAACCCAGATTTCATGGAGCGCATGCGGACTCAGGTGGACACCTGCCGGCACAACTACAGGGTTAATGCCCCGTTCAGCGTGCAGCGCCAAG	CCAGGAGATGATGACGGGAGAGTGTCACTTCCTTAACGGCACGGAGAAGGTGAGATTGGTGGTGAGGCAAATCTACAACCGAGAAGAGTACGCGGTGTTCGACAGCGACGTGGGACAGTACGTGGGGTTCACCCCCTATGGGGAGAAACAGGCCCGGTACTGGAACAGCAACCCAGATTTCATGGAGCGCATGCGGACTCAGGTGGACACCTGCCGGCACAACTACAGGGTTAATGCCCCGTTCAGCGTGCAG	Acar-DAB*83	OP524088
U-145	GGGTGTTCCACTACATGACAACGTCAGAGTGTTACTTCATTAACGGCACGGAGAAGGTGAGGTACATGGAGAGGCAAATCTACAACCGTGTGGAGTACCTGGTATTCGACAGCGACGTGGGGCACTACGTGGGATTCACCCCCTATGGGGAGAAACAGGCCCAGTACAGGAACAGCAAACCAGAATGGATGGAGTACAAACGGGGTCAAGTGGACAATTACTGCCGGTACAACTACGAGCTTGGTGCCCTGTTCACCGTGGAGCGCCGAG	CCACTACATGACAACGTCAGAGTGTTACTTCATTAACGGCACGGAGAAGGTGAGGTACATGGAGAGGCAAATCTACAACCGTGTGGAGTACCTGGTATTCGACAGCGACGTGGGGCACTACGTGGGATTCACCCCCTATGGGGAGAAACAGGCCCAGTACAGGAACAGCAAACCAGAATGGATGGAGTACAAACGGGGTCAAGTGGACAATTACTGCCGGTACAACTACGAGCTTGGTGCCCTGTTCACCGTGGAG	Acar-DAB*84	OP524089
P-147	GCGTGTTCCAGTGGATGGCAAAGTCCGAGTGTCACTTCATTAACGGCACGGAGAAGGTGAGGTTCGTGGAGAGGTACATCTACAACCGTGTGGAGTACGAGATGTTCGACAGCGACGTGGGGCACTACGTGGGGTTCACCCCAGATGGGGAGAGATTTGCCCAGATAACGAACAACAACCAAGAATGGATGGATCACATAATGTCTGCGGTGGACTGGTACTGCCGGCACAACTACCCGATTTTTGCCCCGTTCAGCGTGCAGCGCCGAG	CCAGTGGATGGCAAAGTCCGAGTGTCACTTCATTAACGGCACGGAGAAGGTGAGGTTCGTGGAGAGGTACATCTACAACCGTGTGGAGTACGAGATGTTCGACAGCGACGTGGGGCACTACGTGGGGTTCACCCCAGATGGGGAGAGATTTGCCCAGATAACGAACAACAACCAAGAATGGATGGATCACATAATGTCTGCGGTGGACTGGTACTGCCGGCACAACTACCCGATTTTTGCCCCGTTCAGCGTGCAG	Acar-DAB*85	OP524090
M-148	GGGTGTTCCAGCACGTGTTTAAGGGCGAGTTTCACTTCATTAACGGCACGGAGAAGGTGAGGTACGTGCAGAGGTTCATCTACAACCGTGTGATGTGGGCGATGTTCGACAGCGACGTGGGGCACTTCGTGGGGCTCACTCCCTTAGGGGAGAAATGAGCCCAGTACTGGAACAGCAACCCAGATCTCATGGAGCGCATTCGGAGCGAGGTGGACAGCTTATGCAGGCGCAACCACCCGACTGCTGCCCCGTTCAGCGTGCAGCGCCGTG	CCAGCACGTGTTTAAGGGCGAGTTTCACTTCATTAACGGCACGGAGAAGGTGAGGTACGTGCAGAGGTTCATCTACAACCGTGTGATGTGGGCGATGTTCGACAGCGACGTGGGGCACTTCGTGGGGCTCACTCCCTTAGGGGAGAAATGAGCCCAGTACTGGAACAGCAACCCAGATCTCATGGAGCGCATTCGGAGCGAGGTGGACAGCTTATGCAGGCGCAACCACCCGACTGCTGCCCCGTTCAGCGTGCAG	Acar-DAB*86	OP524107
P-149	GGATGTTCCACTACATGACAACGTCAGAGTGTTACTTCATTAACGGCACGGAGAAAGTGAGGTACATTGAGAGGGCCATGTACAACCGGGAGCAGGACCTGATGTTCGACAGCGATGTGGGGCACTTCGAGGGGTTCACCACCTTTGGGGAGAAACAGGCCCAGTACTGGAACAGCCTCCCAGATATCATGGAGAGGAGGCGGACTGCGGTGGACTGGTACTGCCGGTACAACTACGAGATTTATGGCCTGTTCAGCGTGGAGCGCCGAG	CCACTACATGACAACGTCAGAGTGTTACTTCATTAACGGCACGGAGAAAGTGAGGTACATTGAGAGGGCCATGTACAACCGGGAGCAGGACCTGATGTTCGACAGCGATGTGGGGCACTTCGAGGGGTTCACCACCTTTGGGGAGAAACAGGCCCAGTACTGGAACAGCCTCCCAGATATCATGGAGAGGAGGCGGACTGCGGTGGACTGGTACTGCCGGTACAACTACGAGATTTATGGCCTGTTCAGCGTGGAG	Acar-DAB*87	OP524091
M-150	GGGTGTTTCAGAATTTGCAAAAGTTCGAGTGTCACTTCATTAACGGCACGGAGAAGGTGAGGTACATCCACAGGTTCATCTACAACCAGCTGCAGCAGGTGATATTTGACAGCGACGTGGGGCACTACGTGGGGTTTACCCCCTATGGAGAGAAACAGGCCCAGTGCTGGAATAGCAACCCAGATATCCTGGAGAACAAGCGGACTGCGGTAGACTGGTACTGCCGGCACAACTACGAGCTTGATGCCCCGTTCAGTGTGCACCGCCGAG	TCAGAATTTGCAAAAGTTCGAGTGTCACTTCATTAACGGCACGGAGAAGGTGAGGTACATCCACAGGTTCATCTACAACCAGCTGCAGCAGGTGATATTTGACAGCGACGTGGGGCACTACGTGGGGTTTACCCCCTATGGAGAGAAACAGGCCCAGTGCTGGAATAGCAACCCAGATATCCTGGAGAACAAGCGGACTGCGGTAGACTGGTACTGCCGGCACAACTACGAGCTTGATGCCCCGTTCAGTGTGCAC	Acar-DAB*88	OP524092
P-151	GGGTGTTTCAGAATTTGCAAAAGTTCGAGTGTCACTTCATTAACGGCACGGAGAAGGTGAGGTACATCCACAGGTTCATCTACAACCAGCTGCAGCAGGTGATATTTGACAGCGACGTGGGGCACTACGTGGGGTTTACCCCCTATGGAGAGAAACAGGCCCAGTGCTGGAACAGCAACCCAGATATCCTGGAGAACAAGCGGACTGCGGTAGACTGGTACTGCCGGCACAACTACGAGCTTGATGCCCCGTTCAGTGTGCACCGCCGAG	TCAGAATTTGCAAAAGTTCGAGTGTCACTTCATTAACGGCACGGAGAAGGTGAGGTACATCCACAGGTTCATCTACAACCAGCTGCAGCAGGTGATATTTGACAGCGACGTGGGGCACTACGTGGGGTTTACCCCCTATGGAGAGAAACAGGCCCAGTGCTGGAACAGCAACCCAGATATCCTGGAGAACAAGCGGACTGCGGTAGACTGGTACTGCCGGCACAACTACGAGCTTGATGCCCCGTTCAGTGTGCAC	Acar-DAB*89	OP524093
P-153	GGGTGTTCCACTACATGGCTACACACGAGTGTTACTACAATAATGGCACGGAGAAGGTGAGGTACATCCACAGGCACATCTACAACCGTGTGGAGTGGGCGATGCTCGACAGCGACGTGGGGCACTACGTGGGGTTCACCCCCTTTGGGGAGAAACAGGCCCAGGACTGGAACAGTGACCCAGATATCCTGGAGAACAAGCGAACTGCGGTGGACTGGCTCTGCCGGCACAACTACAAGGTCGATGCCCCATTCACCGTGCCTCGCAGAG	CCACTACATGGCTACACACGAGTGTTACTACAATAATGGCACGGAGAAGGTGAGGTACATCCACAGGCACATCTACAACCGTGTGGAGTGGGCGATGCTCGACAGCGACGTGGGGCACTACGTGGGGTTCACCCCCTTTGGGGAGAAACAGGCCCAGGACTGGAACAGTGACCCAGATATCCTGGAGAACAAGCGAACTGCGGTGGACTGGCTCTGCCGGCACAACTACAAGGTCGATGCCCCATTCACCGTGCCT	Acar-DAB*90	OP524094
P-154	GGGTGTTCCAGTTTCTGGGAAAGGTCGAGTGTCACTTCATTAACGGCACGGAGAAGGTGAGGTTGGTGGAGAGGCACATCTACAGCCGGGAACAGTACTTGATGTTCGACAGGGGGCTCTACGTGGGGTTCACCCCCTATGGGGAGAAATCGGCCCAGTACTGGAACAGCAACCCGGAACGGATGGACTACCAGCGGACTGTGGTGGACACGTACTGCCGGCACAACTACGAGATTTCTGTCCCATTCATCGTGGATCGCCGAG	CCAGTTTCTGGGAAAGGTCGAGTGTCACTTCATTAACGGCACGGAGAAGGTGAGGTTGGTGGAGAGGCACATCTACAGCCGGGAACAGTACTTGATGTTCGACAGGGGGCTCTACGTGGGGTTCACCCCCTATGGGGAGAAATCGGCCCAGTACTGGAACAGCAACCCGGAACGGATGGACTACCAGCGGACTGTGGTGGACACGTACTGCCGGCACAACTACGAGATTTCTGTCCCATTCATCGTGGAT	Acar-DAB*91	OP524095
M-9 (PP1)	GGGTGTTCCAGCACATGTTTAAGGGCGAGTGTCACTTCATTAACGGCACGGAGAAGGTGAGGTACGTGCAGAGGTTCATCTACAACCGTGTGATGTGGGCGATGTTCGACAGCGACGTGGGGCACTACGTGGGGTTCACTCCCTTAGGGGAGAAATGGGCCAAGTACTGGAACAGCAACCCAGATCTCATGGAGCGCATTCAGAGCGAGGTGGACAGCTTATGCAGGCGCAACCACCCGACTGCTGCCCCGTTCAGCGTGCAGCGCCGTG	NA	Acar-DAB*92	OP524096
M-5 (PP5)	NA	CCAATGGATGGGAAGGTTCGAGTGTTACTACATTAATGGCACAGAGAAGGTGAGGTACGTGGCGAGAGGCATCTACAACCGGGAGGAGTACGCGATGTTCGACAGCGACGTGGGGCACTTCGTGGGGTTCAACCCCTATGGGGAGAAACAGGCCCAGTCCAAGAACAGCGACCCAGAACAGATGGAGATTTATCGGACTGCGGTGGACACGTACTGCCGGCACAACTACAGATTGGCCGCCCCGTACCTCCCGGGG	Acar-DAB*93	OP524097
U-6 (PP5)	NA	CTAGTTTATGGATAAGCACGAGTGTCACTTCATTAACGGCACGGAGAAGGTGAGGTACATCCACAGGGGCATCTTCAACCGAGAGCAGCTTTATCAGTTCGACAGCGACGTGGGGCACTACGTGGGGTTCACCTCCCATTGGGAGAACCAGTTCCGGGAATGGAAGTGCGACCCGGAAGGGATGGAGTACACACGGACTGCGGTAGACAGGTACTGCCGGCACAACTACAGATTGGCCGCCCCGTACCTCCCGATT	Acar-DAB*94	OP524108
U-126	GGGTGTTCCAGCACATGTTTAAGGGCGAGTGTCACTTCCTTAACGGCACGGAGAAGGTGAGGTACGTGCAGAGGTTCATCTACAACCGTGTGATGTGGGCGATGTTCGACAGCGACGTGGGGCACTTCGTGGGGCTCACTCCCTTAGGGGAGAAATGGGCCCAGTACTGGAACAGCAACCCAGATCTCATGGAGCGCATTCGGAGCGAGGTGGACAGCTTATGCAGGCGCAACCACCCGACTGCTGCCCCGTTCAGCGTGCAGCGCCGTG	CCAGCACATGTTTAAGGGCGAGTGTCACTTCCTTAACGGCACGGAGAAGGTGAGGTACGTGCAGAGGTTCATCTACAACCGTGTGATGTGGGCGATGTTCGACAGCGACGTGGGGCACTTCGTGGGGCTCACTCCCTTAGGGGAGAAATGGGCCCAGTACTGGAACAGCAACCCAGATCTCATGGAGCGCATTCGGAGCGAGGTGGACAGCTTATGCAGGCGCAACCACCCGACTGCTGCCCCGTTCAGCGTGCAG	Acar-DAB*95	OP524098
